# Supplementary material for: Comparative kinase and cancer cell panel profiling of kinase inhibitors approved for clinical use from 2018 to 2020
Source: Front Oncol. 2022 Sep 14;12:953013. doi: 10.3389/fonc.2022.953013 (PMC9516332; doi:10.3389/fonc.2022.953013)
Supplement: Supplementary file 1 [file Table_1.xlsx]

## Sheet: Blad1
Supplementary Table S1. The 21 recently approved kinase inhibitors and 13 previously approved comparators included in this study in alphabetical order of generic name.
						Biochemical assays		Cell viability assays
Generic name	Code name	Trade name	Primary target	Vendor	Reference	Stock concentration	Starting concentration in assay	Stock concentration	Starting concentration in assay
acalabrutinib	ACP-196	Calquence	BTK	MedChemExpress	HY-17600	10 mM	1 μM	10 mM	31.6 μM
alectinib	RO5424802, CH5424802	Alecensa	ALK	MedKoo	205799	10 mM	1 μM	10 mM	10 μM
alpelisib	BYL719	Piqray	PI3Kα	LC Laboratories	A-4477	10 mM	1 μM	10 mM	31.6 μM
avapritinib	BLU-285	Ayvakit	PDGFRα	MedKoo	205494	10 mM	1 μM	10 mM	31.6 μM
binimetinib	ARRY-162	Mektovi	MEK1	MedKoo	205531	10 mM	1 μM	10 mM	31.6 μM
brigatinib	AP26113	Alunbrig	ALK	MedChemExpress	HY-12857	10 mM	1 μM	10 mM	10 μM
capmatinib	INC280	Tabrecta	MET	MedKoo	206816	10 mM	1 μM	10 mM	31.6 μM
ceritinib	LDK378	Zykadia	ALK	Selleck Chemicals	S7083	10 mM	1 μM	10 mM	31.6 μM
cobimetinib	GDC-0973	Cotellic	MEK1	Selleck Chemicals	S8041	10 mM	1 μM	10 mM	10 μM
crizotinib	PF-02341066	Xalkori	ALK, ROS1	LC Laboratories	C-7900	10 mM	1 μM	10 mM	31.6 μM
dabrafenib	GSK-2118436	Tafinlar	BRAF[V600E]	Selleck Chemicals	S2807	10 mM	1 μM	10 mM	10 μM
dacomitinib	PF299804	Vizimpro	EGFR	ChemScene	CS-0500	10 mM	1 μM	10 mM	31.6 μM
duvelisib	IPI-145	Copiktra	PI3Kγ/δ	LC Laboratories	D-8147	10 mM	1 μM	10 mM	31.6 μM
encorafenib	LGX818	Braftovi	BRAF[V600E]	MedKoo	205852	10 mM	1 μM	10 mM	31.6 μM
entrectinib	NMS-E628	Rozlytrek	TRK	MedKoo	206181	10 mM	1 μM	10 mM	31.6 μM
erdafitinib	JNJ-42756493	Balversa	FGFR1-3	MedKoo	206440	10 mM	1 μM	10 mM	31.6 μM
gefitinib	ZD-1839	Iressa	EGFR	LC Laboratories	G-4408	10 mM	1 μM	10 mM	31.6 μM
gilteritinib	ASP-2215	Xospata	FLT3	ChemScene	CS-3885	10 mM	1 μM	10 mM	31.6 μM
ibrutinib	PCI-32765	Imbruvica	BTK	MedKoo	202171	10 mM	1 μM	10 mM	31.6 μM
infigratinib	NVP-BGJ398	Truseltiq	FGFR1-3	LC Laboratories	I-1500	10 mM	1 μM	10 mM	31.6 μM or 3.16 μM
larotrectinib	ARRY-470, LOXO-101	Vitrakvi	TRK	ChemScene	CS-5314	10 mM	1 μM	10 mM	31.6 μM
lorlatinib	PF-6463922	Lorbrena	ALK, ROS1	ChemScene	CS-3983	10 mM	1 μM	10 mM	31.6 μM
midostaurin	PKC412	Rydapt	FLT3	MedChem Express	HY-10230	10 mM	1 μM	10 mM	31.6 μM
osimertinib	AZD9291	Tagrisso	EGFR[T790M]	Selleck Chemicals	S7297	10 mM	1 μM	10 mM	31.6 μM
pemigatinib	INCB054828	Pemazyre	FGFR1-3	ChemScene	CS-0039499	10 mM	1 μM	10 mM	31.6 μM
pexidartinib	PLX-3397	Turalio	FMS	MedKoo	206178	10 mM	1 μM	10 mM	31.6 μM
pralsetinib	BLU-667	Gavreto	RET	ChemieTek	sku101	10 mM	1 μM	10 mM	31.6 μM
ripretinib	DCC-2618	Qinlock	KIT	ChemScene	CS-0044835	10 mM	1 μM	10 mM	31.6 μM
selpercatinib	LOXO-292	Retevmo	RET	ChemieTek	sku114	10 mM	1 μM	10 mM	31.6 μM
selumetinib	ARRY-142866, AZD6244	Koselugo	MEK1	Selleck Chemicals	S1008	10 mM	1 μM	10 mM	31.6 μM
trametinib	GSK-1120212	Mekinist	MEK1	LC Laboratories	T-8123	10 mM	1 μM	10 mM	31.6 μM or 28.2 μM
tucatinib	ARRY-380	Tukysa	HER2	MedKoo	200291	10 mM	1 μM	10 mM	31.6 μM
vemurafenib	PLX-4032	Zelboraf	BRAF[V600E]	LC Laboratories	V-2800	10 mM	1 μM	10 mM	31.6 μM
zanubrutinib	BGB-3111	Brukinsa	BTK	Activate Scientific	AS95317	10 mM	1 μM	10 mM	31.6 μM
