# Supplementary material for: Comparative kinase and cancer cell panel profiling of kinase inhibitors approved for clinical use from 2018 to 2020
Source: Front Oncol. 2022 Sep 14;12:953013. doi: 10.3389/fonc.2022.953013 (PMC9516332; doi:10.3389/fonc.2022.953013)
Supplement: Supplementary file 2 [file Table_2.xlsx]

## Sheet: Blad1
Supplementary Table S2. List of the 134 cancer cell lines included in this study, including DepMap disease annotations, cell line providers, RRIDs, and base culture medium and serum concentration.
Cell line	Primary disease	Subtype	Provider	Ref	RRID	Base cell culture medium + serum type and concentration
5637	Bladder Cancer		ATCC	HTB-9	CVCL_0126	RPMI 1640 + 10% Bovine Calf Serum
11-18	Lung Cancer	Non-Small Cell Lung Cancer (NSCLC), Adenocarcinoma	RIKEN	RCB2093	CVCL_6659	RPMI 1640 + 10% Bovine Calf Serum
769-P	Kidney Cancer	Renal Carcinoma, clear cell	ATCC	CRL-1933	CVCL_1050	RPMI 1640 + 10% Bovine Calf Serum
786-O	Kidney Cancer	Renal Carcinoma, clear cell	ATCC	CRL-1932	CVCL_1051	RPMI 1640 + 10% Bovine Calf Serum
A-172	Brain Cancer	Glioblastoma	ATCC	CRL-1620	CVCL_0131	Dulbecco's Modified Eagle Medium (DMEM) + 10% Bovine Calf Serum
A-204	Rhabdoid	Malignant Rhabdoid Tumor	ATCC	HTB-82	CVCL_1058	McCoy's 5A + 10% Bovine Calf Serum
A-375	Skin Cancer	Melanoma	ATCC	CRL-1619	CVCL_0132	Dulbecco's Modified Eagle Medium (DMEM) + 10% Bovine Calf Serum
A-388	Skin Cancer	Squamous Cell Carcinoma	ATCC	CRL-7905	CVCL_1063	Dulbecco's Modified Eagle Medium (DMEM) + 10% Bovine Calf Serum
A-427	Lung Cancer	Non-Small Cell Lung Cancer (NSCLC), Adenocarcinoma	ATCC	HTB-53	CVCL_1055	Eagle's Minimum Essential Medium (EMEM) + 10% Bovine Calf Serum
A-498	Kidney Cancer	Renal Cell Carcinoma	ATCC	HTB-44	CVCL_1056	Eagle's Minimum Essential Medium (EMEM) + 10% Bovine Calf Serum
A-549	Lung Cancer	Non-Small Cell Lung Cancer (NSCLC), Adenocarcinoma	ATCC	CCL-185	CVCL_0023	Ham's F-12K (Kaighn's) + 10% Bovine Calf Serum
A-704	Kidney Cancer	Renal Cell Carcinoma	ATCC	HTB-45	CVCL_1065	Eagle's Minimum Essential Medium (EMEM) + 10% Bovine Calf Serum
ACHN	Kidney Cancer	Renal Cell Carcinoma	ATCC	CRL-1611	CVCL_1067	Eagle's Minimum Essential Medium (EMEM) + 10% Bovine Calf Serum
AN3-CA	Endometrial/Uterine Cancer	Endometrial Adenocarcinoma	ATCC	HTB-111	CVCL_0028	Eagle's Minimum Essential Medium (EMEM) + 10% Bovine Calf Serum
AP-1060	Leukemia	Acute Myelogenous Leukemia (AML), M3 (Promyelocytic)	DSMZ	ACC 593	CVCL_1807	Iscove's Modified Dulbecco's Medium (IMDM) + 20% Heat Inactivated Fetal Bovine Serum
AsPC-1	Pancreatic Cancer	Ductal Adenocarcinoma, exocrine	ATCC	CRL-1682	CVCL_0152	RPMI 1640 + 10% Bovine Calf Serum
AU565	Breast Cancer	Adenocarcinoma	ATCC	CRL-2351	CVCL_1074	RPMI 1640 + 10% Bovine Calf Serum
BT-20	Breast Cancer	Breast Ductal Carcinoma	ATCC	HTB-19	CVCL_0178	Eagle's Minimum Essential Medium (EMEM) + 10% Bovine Calf Serum
BT-474	Breast Cancer	Breast Ductal Carcinoma	ATCC	HTB-20	CVCL_0179	Dulbecco's Modified Eagle Medium (DMEM) + 20% Fetal Bovine Serum
BT-549	Breast Cancer	Breast Ductal Carcinoma	ATCC	HTB-122	CVCL_1092	RPMI 1640 + 10% Bovine Calf Serum
BxPC-3	Pancreatic Cancer	Ductal Adenocarcinoma, exocrine	ATCC	CRL-1687	CVCL_0186	RPMI 1640 + 10% Bovine Calf Serum
C-33 A	Cervical Cancer	Carcinoma	ATCC	HTB-31	CVCL_1094	Eagle's Minimum Essential Medium (EMEM) + 10% Bovine Calf Serum
CAL-27	Head and Neck Cancer	Squamous Cell Carcinoma	ATCC	CRL-2095	CVCL_1107	Dulbecco's Modified Eagle Medium (DMEM) + 10% Bovine Calf Serum
CCF-STTG1	Brain Cancer	Astrocytoma	ATCC	CRL-1718	CVCL_1118	RPMI 1640 + 10% Bovine Calf Serum
CCRF-CEM	Leukemia	Acute Lymphoblastic Leukemia (ALL), T-cell	ATCC	CCL-119	CVCL_0207	RPMI 1640 + 10% Bovine Calf Serum
COLO 205	Colon/Colorectal Cancer	Adenocarcinoma	ATCC	CCL-222	CVCL_0218	RPMI 1640 + 10% Bovine Calf Serum
COLO 829	Skin Cancer	Melanoma	ATCC	CRL-1974	CVCL_1137	RPMI 1640 + 10% Bovine Calf Serum
Daoy	Brain Cancer	Medulloblastoma	ATCC	HTB-186	CVCL_1167	Eagle's Minimum Essential Medium (EMEM) + 10% Bovine Calf Serum
DB	Lymphoma	Diffuse Large B-cell Lymphoma (DLBCL)	ATCC	CRL-2289	CVCL_1168	RPMI 1640 + 10% Bovine Calf Serum
DEL	Lymphoma	T-cell, Non-Hodgkins, Anaplastic Large Cell (ALCL)	DSMZ	ACC 338	CVCL_1170	RPMI 1640 + 10% Bovine Calf Serum
DLD-1	Colon/Colorectal Cancer	Adenocarcinoma	ATCC	CCL-221	CVCL_0248	RPMI 1640 + 10% Bovine Calf Serum
DoTc2 4510	Cervical Cancer	Cervical Adenocarcinoma	ATCC	CRL-7920	CVCL_1181	Dulbecco's Modified Eagle Medium (DMEM) + 10% Bovine Calf Serum
DU145	Prostate Cancer	Adenocarcinoma	ATCC	HTB-81	CVCL_0105	Eagle's Minimum Essential Medium (EMEM) + 10% Bovine Calf Serum
DU4475	Breast Cancer	Carcinoma	ATCC	HTB-123	CVCL_1183	RPMI 1640 + 10% Bovine Calf Serum
EoL-1	Leukemia	Acute Myelogenous Leukemia (AML), M5 (Eosinophilic/Monocytic)	DSMZ	ACC 386	CVCL_0258	RPMI 1640 + 10% Heat Inactivated Fetal Bovine Serum
ES-2	Ovarian Cancer	Adenocarcinoma, clear cell	ATCC	CRL-1978	CVCL_3509	McCoy's 5A + 10% Bovine Calf Serum
FaDu	Head and Neck Cancer	Squamous Cell Carcinoma	ATCC	HTB-43	CVCL_1218	Eagle's Minimum Essential Medium (EMEM) + 10% Bovine Calf Serum
G-361	Skin Cancer	Melanoma	ATCC	CRL-1424	CVCL_1220	McCoy's 5A + 10% Bovine Calf Serum
HCC4006	Lung Cancer	Non-Small Cell Lung Cancer (NSCLC), Adenocarcinoma	ATCC	CRL-2871	CVCL_1269	RPMI 1640 + 10% Bovine Calf Serum
HCC827	Lung Cancer	Non-Small Cell Lung Cancer (NSCLC), Adenocarcinoma	ATCC	CRL-2868	CVCL_2063	RPMI 1640 + 10% Bovine Calf Serum
HCT 116	Colon/Colorectal Cancer	Adenocarcinoma	ATCC	CCL-247	CVCL_0291	McCoy's 5A + 10% Bovine Calf Serum
HCT 15	Colon/Colorectal Cancer	Adenocarcinoma	ATCC	CCL-225	CVCL_0292	RPMI 1640 + 10% Bovine Calf Serum
HEC-1	Endometrial/Uterine Cancer	Endometrial Adenocarcinoma	JCRB	JCRB0042	CVCL_1274	Eagle's Minimum Essential Medium (EMEM) + 10% Bovine Calf Serum
HEC-1-B	Endometrial/Uterine Cancer	Endometrial Adenocarcinoma	ATCC	HTB-113	CVCL_0294	Eagle's Minimum Essential Medium (EMEM) + 10% Bovine Calf Serum
HEC-6	Endometrial/Uterine Cancer	Endometrial Adenocarcinoma	JCRB	JCRB1118	CVCL_2931	Eagle's Minimum Essential Medium (EMEM) + 10% Bovine Calf Serum
HL-60	Leukemia	Acute Myelogenous Leukemia (AML), M3 (Promyelocytic)	ATCC	CCL-240	CVCL_0002	Iscove's Modified Dulbecco's Medium (IMDM) + 10% Bovine Calf Serum
Hs 578T	Breast Cancer	Carcinoma	ATCC	HTB-126	CVCL_0332	Dulbecco's Modified Eagle Medium (DMEM) + 10% Bovine Calf Serum
Hs 746.T	Gastric Cancer	Adenocarcinoma	ATCC	HTB-135	CVCL_0333	Dulbecco's Modified Eagle Medium (DMEM) + 10% Bovine Calf Serum
Hs 766T	Pancreatic Cancer	Ductal Adenocarcinoma, exocrine	ATCC	HTB-134	CVCL_0334	Dulbecco's Modified Eagle Medium (DMEM) + 10% Bovine Calf Serum
Hs 852.T	Skin Cancer	Melanoma	ATCC	CRL-7585	CVCL_0950	Dulbecco's Modified Eagle Medium (DMEM) + 10% Bovine Calf Serum
HT	Lymphoma	B-cell, Non-Hodgkins	ATCC	CRL-2260	CVCL_1290	RPMI 1640 + 10% Bovine Calf Serum
HT-1080	Sarcoma	Fibrosarcoma	ATCC	CCL-121	CVCL_0317	Eagle's Minimum Essential Medium (EMEM) + 10% Bovine Calf Serum
HuTu 80	Gastric Cancer	Duodenal Adenocarcinoma	ATCC	HTB-40	CVCL_1301	Eagle's Minimum Essential Medium (EMEM) + 10% Bovine Calf Serum
J82	Bladder Cancer	Transitional Cell Carcinoma	ATCC	HTB-1	CVCL_0359	Eagle's Minimum Essential Medium (EMEM) + 10% Bovine Calf Serum
JAR	Endometrial/Uterine Cancer	Choriocarcinoma	ATCC	HTB-144	CVCL_0360	RPMI 1640 + 10% Bovine Calf Serum
Jurkat E6.1	Leukemia	Acute Lymphoblastic Leukemia (ALL), T-cell	ATCC	TIB-152	CVCL_0367	RPMI 1640 + 10% Bovine Calf Serum
K-562	Leukemia	Chronic Myelogenous Leukemia (CML), blast crisis	ATCC	CCL-243	CVCL_0004	Iscove's Modified Dulbecco's Medium (IMDM) + 10% Bovine Calf Serum
Kasumi-1	Leukemia	Acute Myelogenous Leukemia (AML), M2 (Myeloblastic)	ATCC	CRL-2724	CVCL_0589	RPMI 1640 + 10% Bovine Calf Serum
KATO III	Gastric Cancer	Adenocarcinoma, signet ring cell	ATCC	HTB-103	CVCL_0371	Iscove's Modified Dulbecco's Medium (IMDM) + 10% Bovine Calf Serum
KG-1	Leukemia	Acute Myelogenous Leukemia (AML)	ATCC	CCL-246	CVCL_0374	Iscove's Modified Dulbecco's Medium (IMDM) + 10% Bovine Calf Serum
KLE	Endometrial/Uterine Cancer	Endometrial Adenocarcinoma	ATCC	CRL-1622	CVCL_1329	DMEM/F-12 + 10% Bovine Calf Serum
KMS-11	Myeloma	Multiple Myeloma	JCRB	JCRB1179	CVCL_2989	RPMI 1640 + 10% Bovine Calf Serum
Ku812	Leukemia	Chronic Myelogenous Leukemia (CML), blast crisis	ATCC	CRL-2099	CVCL_0379	RPMI 1640 + 10% Bovine Calf Serum
L-82	Lymphoma	T-cell	DSMZ	ACC 597	CVCL_2098	RPMI 1640 + 10% Bovine Calf Serum
LC-2/ad	Lung Cancer	Non-Small Cell Lung Cancer (NSCLC), Adenocarcinoma	RIKEN	RCB0440	CVCL_1373	RPMI 1640 + 10% Bovine Calf Serum
LNCaP clone FGC	Prostate Cancer	Adenocarcinoma	ATCC	CRL-1740	CVCL_1379	RPMI 1640 + 10% Bovine Calf Serum
LoVo	Colon/Colorectal Cancer	Adenocarcinoma	ATCC	CCL-229	CVCL_0399	Ham's F-12K (Kaighn's) + 10% Bovine Calf Serum
LS174T	Colon/Colorectal Cancer	Adenocarcinoma	ATCC	CL-188	CVCL_1384	Eagle's Minimum Essential Medium (EMEM) + 10% Bovine Calf Serum
LS411N	Colon/Colorectal Cancer	Adenocarcinoma	ATCC	CRL-2159	CVCL_1385	RPMI 1640 + 10% Bovine Calf Serum
MCF-7	Breast Cancer	Carcinoma	ATCC	HTB-22	CVCL_0031	Eagle's Minimum Essential Medium (EMEM) + 10% Bovine Calf Serum
MDA-MB-231	Breast Cancer	Carcinoma	ATCC	HTB-26	CVCL_0062	RPMI 1640 + 10% Bovine Calf Serum
MDA-MB-453	Breast Cancer	Carcinoma	ATCC	HTB-131	CVCL_0418	RPMI 1640 + 10% Bovine Calf Serum
MDA-MB-468	Breast Cancer	Carcinoma	ATCC	HTB-132	CVCL_0419	RPMI 1640 + 10% Bovine Calf Serum
MeWo	Skin Cancer	Melanoma	ATCC	HTB-65	CVCL_0445	Eagle's Minimum Essential Medium (EMEM) + 10% Bovine Calf Serum
MG-63	Bone Cancer	Osteosarcoma	ATCC	CRL-1427	CVCL_0426	Eagle's Minimum Essential Medium (EMEM) + 10% Bovine Calf Serum
MIA PaCa-2	Pancreatic Cancer	Ductal Adenocarcinoma, exocrine	ATCC	CRL-1420	CVCL_0428	Dulbecco's Modified Eagle Medium (DMEM) + 10% Bovine Calf Serum
MKN45	Gastric Cancer	Adenocarcinoma	DSMZ	ACC 409	CVCL_0434	RPMI 1640 + 10% Bovine Calf Serum
MOLM-13	Leukemia	Acute Myelogenous Leukemia (AML)	DSMZ	ACC 554	CVCL_2119	RPMI 1640 + 10% Bovine Calf Serum
MOLT-4	Leukemia	Acute Lymphoblastic Leukemia (ALL), T-cell	ATCC	CRL-1582	CVCL_0013	RPMI 1640 + 10% Bovine Calf Serum
MV4-11	Leukemia	Acute Myelogenous Leukemia (AML)	ATCC	CRL-9591	CVCL_0064	Iscove's Modified Dulbecco's Medium (IMDM) + 10% Bovine Calf Serum
NCC-IT	Embryonal Cancer	Carcinoma	ATCC	CRL-2073	CVCL_1451	RPMI 1640 + 10% Bovine Calf Serum
NCI-H1650	Lung Cancer	Non-Small Cell Lung Cancer (NSCLC), Adenocarcinoma	ATCC	CRL-5883	CVCL_1483	RPMI 1640 + 10% Bovine Calf Serum
NCI-H1975	Lung Cancer	Non-Small Cell Lung Cancer (NSCLC), Adenocarcinoma	ATCC	CRL-5908	CVCL_1511	RPMI 1640 + 10% Bovine Calf Serum
NCI-H2228	Lung Cancer	Non-Small Cell Lung Cancer (NSCLC), Adenocarcinoma	ATCC	CRL-5935	CVCL_1543	RPMI 1640 + 10% Bovine Calf Serum
NCI-H460	Lung Cancer	Non-Small Cell Lung Cancer (NSCLC), Large Cell Carcinoma	ATCC	HTB-177	CVCL_0459	RPMI 1640 + 10% Bovine Calf Serum
NCI-H661	Lung Cancer	Non-Small Cell Lung Cancer (NSCLC), Large Cell Carcinoma	ATCC	HTB-183	CVCL_1577	RPMI 1640 + 10% Bovine Calf Serum
NCI-H716	Colon/Colorectal Cancer	Adenocarcinoma	ATCC	CCL-251	CVCL_1581	RPMI 1640 + 10% Bovine Calf Serum
NCI-H82	Lung Cancer	Small Cell Lung Cancer (SCLC)	ATCC	HTB-175	CVCL_1591	RPMI 1640 + 10% Bovine Calf Serum
OVCAR-3	Ovarian Cancer	Adenocarcinoma, high grade serous	ATCC	HTB-161	CVCL_0465	RPMI 1640 + 10% Bovine Calf Serum
PA-1	Ovarian Cancer		ATCC	CRL-1572	CVCL_0479	Eagle's Minimum Essential Medium (EMEM) + 10% Bovine Calf Serum
PC-3	Prostate Cancer	Adenocarcinoma	ATCC	CRL-1435	CVCL_0035	Ham's F-12K (Kaighn's) + 10% Bovine Calf Serum
PFSK-1	Brain Cancer	Primitive Neuroectodermal Tumor (PNET)	ATCC	CRL-2060	CVCL_1642	RPMI 1640 + 10% Bovine Calf Serum
RD	Sarcoma	Rhabdomyosarcoma, embryonal	ATCC	CCL-136	CVCL_1649	Dulbecco's Modified Eagle Medium (DMEM) + 10% Bovine Calf Serum
REC-1	Lymphoma	B-cell, Non-Hodgkins, Mantle Cell	DSMZ	ACC 584	CVCL_1884	RPMI 1640 + 20% Heat Inactivated Fetal Bovine Serum
Rh30	Sarcoma	Rhabdomyosarcoma, alveolar	ATCC	CRL-2061	CVCL_0041	RPMI 1640 + 10% Bovine Calf Serum
RKO	Colon/Colorectal Cancer	Adenocarcinoma	ATCC	CRL-2577	CVCL_0504	Eagle's Minimum Essential Medium (EMEM) + 10% Bovine Calf Serum
RL	Lymphoma	B-cell, Non-Hodgkins	ATCC	CRL-2261	CVCL_1660	RPMI 1640 + 10% Bovine Calf Serum
RL95-2	Endometrial/Uterine Cancer	Endometrial Adenosquamous Carcinoma	ATCC	CRL-1671	CVCL_0505	DMEM/F-12 + 10% Bovine Calf Serum
RPMI-7951	Skin Cancer	Melanoma	ATCC	HTB-66	CVCL_1666	Eagle's Minimum Essential Medium (EMEM) + 10% Bovine Calf Serum
RS4;11	Leukemia	Acute Lymphoblastic Leukemia (ALL), B-cell	ATCC	CRL-1873	CVCL_0093	RPMI 1640 + 10% Bovine Calf Serum
RT-4	Bladder Cancer	Transitional Cell Carcinoma	ATCC	HTB-2	CVCL_0036	McCoy's 5A + 10% Bovine Calf Serum
SHP-77	Lung Cancer	Small Cell Lung Cancer (SCLC)	ATCC	CRL-2195	CVCL_1693	RPMI 1640 + 10% Bovine Calf Serum
SK-BR-3	Breast Cancer	Carcinoma	ATCC	HTB-30	CVCL_0033	McCoy's 5A + 10% Bovine Calf Serum
SK-N-AS	Neuroblastoma		ATCC	CRL-2137	CVCL_1700	Dulbecco's Modified Eagle Medium (DMEM) + 10% Bovine Calf Serum
SK-N-FI	Neuroblastoma		ATCC	CRL-2142	CVCL_1702	Dulbecco's Modified Eagle Medium (DMEM) + 10% Bovine Calf Serum
SK-N-MC	Bone Cancer	Ewings Sarcoma	ATCC	HTB-10	CVCL_0530	Eagle's Minimum Essential Medium (EMEM) + 10% Bovine Calf Serum
SK-N-SH	Neuroblastoma		ATCC	HTB-11	CVCL_0531	Eagle's Minimum Essential Medium (EMEM) + 10% Bovine Calf Serum
SNU-16	Gastric Cancer	Adenocarcinoma	ATCC	CRL-5974	CVCL_0076	RPMI 1640 + 10% Bovine Calf Serum
SNU-5	Gastric Cancer	Adenocarcinoma	ATCC	CRL-5973	CVCL_0078	Iscove's Modified Dulbecco's Medium (IMDM) + 10% Bovine Calf Serum
SNU-C2B	Colon/Colorectal Cancer	Adenocarcinoma	ATCC	CCL-250	CVCL_1710	RPMI 1640 + 10% Bovine Calf Serum
SR	Lymphoma	T-cell, Non-Hodgkins, Anaplastic Large Cell (ALCL)	ATCC	CRL-2262	CVCL_1711	RPMI 1640 + 10% Bovine Calf Serum
SU-DHL-1	Lymphoma	T-cell, Non-Hodgkins, Anaplastic Large Cell (ALCL)	ATCC	CRL-2955	CVCL_0538	RPMI 1640 + 10% Bovine Calf Serum
SU-DHL-6	Lymphoma	Diffuse Large B-cell Lymphoma (DLBCL)	ATCC	CRL-2959	CVCL_2206	RPMI 1640 + 10% Bovine Calf Serum
SUP-T1	Leukemia	Acute Lymphoblastic Leukemia (ALL), T-cell	DSMZ	ACC 140	CVCL_1714	RPMI 1640 + 10% Bovine Calf Serum
SW48	Colon/Colorectal Cancer	Adenocarcinoma	ATCC	CCL-231	CVCL_1724	RPMI 1640 + 10% Bovine Calf Serum
SW480	Colon/Colorectal Cancer	Adenocarcinoma	ATCC	CCL-228	CVCL_0546	RPMI 1640 + 10% Bovine Calf Serum
SW620	Colon/Colorectal Cancer	Adenocarcinoma	ATCC	CCL-227	CVCL_0547	RPMI 1640 + 10% Bovine Calf Serum
SW626	Colon/Colorectal Cancer		ATCC	HTB-78	CVCL_1725	RPMI 1640 + 10% Bovine Calf Serum
SW780	Bladder Cancer	Transitional Cell Carcinoma	ATCC	CRL-2169	CVCL_1728	RPMI 1640 + 10% Bovine Calf Serum
SW837	Colon/Colorectal Cancer	Adenocarcinoma	ATCC	CCL-235	CVCL_1729	RPMI 1640 + 10% Bovine Calf Serum
SW872	Liposarcoma		ATCC	HTB-92	CVCL_1730	RPMI 1640 + 10% Bovine Calf Serum
SW900	Lung Cancer	Non-Small Cell Lung Cancer (NSCLC), Squamous Cell Carcinoma	ATCC	HTB-59	CVCL_1731	RPMI 1640 + 10% Bovine Calf Serum
SW948	Colon/Colorectal Cancer	Adenocarcinoma	ATCC	CCL-237	CVCL_0632	RPMI 1640 + 10% Bovine Calf Serum
SW982	Sarcoma	Synovial	ATCC	HTB-93	CVCL_1734	RPMI 1640 + 10% Bovine Calf Serum
T24	Bladder Cancer	Carcinoma	ATCC	HTB-4	CVCL_0554	McCoy's 5A + 10% Bovine Calf Serum
T98G	Brain Cancer	Glioblastoma	ATCC	CRL-1690	CVCL_0556	Eagle's Minimum Essential Medium (EMEM) + 10% Bovine Calf Serum
TCCSUP	Bladder Cancer	Transitional Cell Carcinoma	ATCC	HTB-5	CVCL_1738	Eagle's Minimum Essential Medium (EMEM) + 10% Bovine Calf Serum
THP-1	Leukemia	Acute Myelogenous Leukemia (AML), M5 (Eosinophilic/Monocytic)	ATCC	TIB-202	CVCL_0006	RPMI 1640 + 10% Bovine Calf Serum
TT	Thyroid Cancer	Squamous Cell Carcinoma	ATCC	CRL-1803	CVCL_1774	Ham's F-12K (Kaighn's) + 10% Bovine Calf Serum
U-118MG	Brain Cancer	Astrocytoma	ATCC	HTB-15	CVCL_0633	Dulbecco's Modified Eagle Medium (DMEM) + 10% Bovine Calf Serum
U2OS	Bone Cancer	Osteosarcoma	ATCC	HTB-96	CVCL_0042	McCoy's 5A + 10% Bovine Calf Serum
U-87MG ATCC	Brain Cancer	Astrocytoma	ATCC	HTB-14	CVCL_0022	Eagle's Minimum Essential Medium (EMEM) + 10% Bovine Calf Serum
UM-UC-3	Bladder Cancer	Transitional Cell Carcinoma	ATCC	CRL-1749	CVCL_1783	Eagle's Minimum Essential Medium (EMEM) + 10% Bovine Calf Serum
VA-ES-BJ	Sarcoma	Epithelioid	ATCC	CRL-2138	CVCL_1785	Dulbecco's Modified Eagle Medium (DMEM) + 10% Bovine Calf Serum
