# Supplementary material for: Comparative kinase and cancer cell panel profiling of kinase inhibitors approved for clinical use from 2018 to 2020
Source: Front Oncol. 2022 Sep 14;12:953013. doi: 10.3389/fonc.2022.953013 (PMC9516332; doi:10.3389/fonc.2022.953013)
Supplement: Supplementary file 3 [file Table_3.xlsx]

## Sheet: Blad1
Supplementary Table S3. Biochemical profiling of kinase inhibitors. Table indicates %-inhibition at 1 µmol/L single concentration in individual kinase assays. For assay details, see www.carnabio.com.
	acalabrutinib$	alectinib$	alpelisib	avapritinib	binimetinib	brigatinib$	capmatinib	ceritinib$	cobimetinib$	crizotinib*	dabrafenib*	dacomitinib	duvelisib	encorafenib	entrectinib	erdafitinib	gefitinib*	gilteritinib	ibrutinib$	infigratinib	larotrectinib	lorlatinib	midostaurin$	osimertinib$	pemigatinib	pexidartinib	pralsetinib	ripretinib	selpercatinib	selumetinib	trametinib*	tucatinib	vemurafenib*	zanubrutinib
ABL	-2.81408	5.09739	16.0885	57.0863	-1.52689	53.8681	-1.84429	-1.61234	-4.08592	82.1186	29.7932	30.5551	-1.99843	-5.41147	77.2202	84.6525	34.3373	40.4415	7.80131	9.97648	-6.76885	-2.33524	9.35356	4.61669	9.626	0.0639898	36.7125	18.0664	15.8063	-6.58497	-7.80075	-2.88402	14.8305	-4.52483
ACK	14.056	42.499	5.50192	72.7899	-4.12466	104.02	1.01195	103.311	6.97674	55.7769	24.1494	31.8858	2.27886	-4.66421	101.441	22.5543	47.0223	90.0587	72.7395	42.8531	52.3442	100.689	101.876	99.7793	4.31605	12.3037	84.2586	23.1326	4.48152	0.73085	-5.39419	9.19185	40.3187	10.8246
AKT1	-6.22788	3.24809	-6.3472	-9.23964	-4.98135	1.50131	-10.3926	-7.70065	-6.86722	-6.83132	-0.776915	-22.4979	-5.84218	-1.98565	-8.96413	-6.5538	3.35329	-21.6709	-9.41318	-12.091	-15.0943	-4.15495	46.6206	-8.60258	-11.9859	-19.7806	-12.3403	-6.1097	-10.2348	-11.4366	-3.10766	-9.33313	-4.51918	-12.7053
AKT2	-2.69072	0.305906	-0.795262	-0.192156	0.0507614	-0.955175	1.53724	-4.70096	-2.75315	-2.67407	-9.83911	-1.18547	-0.908065	1.94585	-3.6943	-2.92724	4.28725	-4.72913	-3.11525	-0.768622	-5.2684	-2.30682	47.7775	2.20377	-2.20451	-5.97833	0.305188	-4.86934	-1.75613	0.316491	-7.98267	-1.45812	-2.97679	-4.1101
AKT3	-4.92296	-0.88939	-0.151233	-4.98396	-5.68869	-0.864337	-5.15667	-4.0461	-3.43229	-1.82672	-7.50873	-5.05076	0.2792	-0.872499	-1.27966	3.3155	5.26778	-4.56198	-2.25479	-7.08117	-5.463	-0.767799	58.136	-1.7412	-2.69921	-6.14112	-2.71404	-6.41684	-0.710319	-6.415	-5.29686	-4.57686	-0.678497	-3.11249
ALK	5.26662	99.1921	1.83703	34.6805	6.36763	100.365	28.4792	99.4434	4.90753	101.277	-1.9796	16.8256	3.74169	7.70878	99.7182	29.0206	11.3606	101.125	5.44617	42.574	7.28124	99.6957	86.8275	98.6654	-1.12103	10.9742	35.059	2.67924	4.10318	33.7007	-2.81944	32.3202	1.14247	2.23117
AMPKα1/β1/γ1	-4.92206	5.2101	-5.14346	8.99759	-6.75503	79.9983	-4.63512	20.798	-0.872586	16.474	32.4201	-11.6457	-4.19459	-2.31192	55.2677	-6.61947	5.67537	0.625051	-4.12572	-4.15397	-5.63957	-3.57708	86.0471	-4.87123	-6.52174	-11.0864	45.5493	-9.81989	21.9754	-2.66239	-12.4539	-3.92943	-1.5896	-5.51355
AMPKα2/β1/γ1	3.4973	6.27737	2.21993	3.10615	-3.66546	90.1365	-1.20652	39.8794	9.43827	26.5918	77.5839	-2.95378	-0.154879	0.722767	78.5364	-1.69076	5.74713	20.7516	10.2126	-2.10499	-5.93135	2.21993	90.1619	10.53	-5.04796	-7.31304	83.3526	-22.4051	28.2812	1.89963	1.20805	-1.43756	6.49189	-4.90914
ARG	3.52551	0.972241	3.27756	46.7487	1.38501	55.1361	3.28594	-1.08128	-1.5356	80.0971	54.1864	39.8126	0.877457	1.6947	82.8853	68.7341	38.6364	61.1339	6.86021	24.042	-0.835429	1.48824	25.4146	5.35187	6.67445	6.71351	38.2348	56.4696	9.55803	1.59528	-3.94945	3.72811	6.99029	-3.68308
AurA	2.33708	5.00027	-0.801258	4.61653	-2.974	79.2326	3.77619	11.9789	-0.69569	87.7526	79.9136	-1.72373	-4.53719	0.211375	80.9763	-5.39252	8.63821	80.3276	29.8386	-5.38241	-4.50231	21.2997	100.223	9.26137	10.708	44.3251	73.3752	-1.90517	66.0595	-5.66961	-1.94384	-1.53175	22.5964	-1.42381
AurA/TPX2	-4.71395	-3.15674	-0.569801	9.72653	-4.02367	74.3483	-5.83592	2.8436	-1.87881	89.7789	75.9738	1.01342	1.8146	-3.31361	74.5913	-1.95485	-6.9869	71.2396	-2.32735	-10.093	-2.87891	29.314	90.8429	7.37982	-4.42909	21.3287	69.5376	-0.806981	71.1755	-7.97857	-5.37105	-8.81026	-2.58657	-0.885126
AurB	10.858	9.3362	-4.26064	19.6849	-3.17763	46.1304	4.24354	7.94453	-10.828	90.404	39.1493	1.91417	0.416543	-0.690271	47.9381	25.7542	4.79735	63.6674	-1.09632	-4.8964	-4.56676	5.16513	86.2585	-1.23648	2.31686	59.583	38.277	4.90124	78.6126	12.2055	-3.90625	-0.567698	5.80808	-3.88376
AurC	7.20677	2.6517	4.51293	13.9194	-6.37083	43.9727	-4.72414	3.4651	-2.68424	86.6667	22.7496	0.922233	10.0113	-10.4507	66.7399	31.0131	12.9887	41.002	6.94648	-7.5755	-0.0474834	18.6982	100.098	2.32634	5.03324	67.9212	35.9204	0.52343	80.0214	-0.455542	0.981997	-5.26405	13.3981	-0.854701
AXL	-0.457012	59.4116	-3.59116	36.9672	-1.70166	96.8152	34.2765	56.084	2.88489	101.283	30.3696	40.3386	-0.298343	0.276243	96.2983	7.92265	25.3056	100.35	8.96887	29.718	4.22063	8.24309	87.018	43.1591	4.45355	39.2245	92.4919	3.87766	93.124	26.3153	-1.1248	22.4226	19.6446	4.55604
BLK	8.42821	16.6482	-13.2926	50.1189	10.2228	82.9214	-3.9737	2.06887	10.3582	47.032	80.4954	76.6179	-12.3091	10.2973	85.627	72.4983	42.617	93.8391	101.194	20.5541	-3.858	-6.16944	83.574	66.2455	26.843	18.0987	83.9373	26.0146	76.4354	-6.07248	-2.78638	2.26669	52.1461	98.4061
BMX	71.3184	3.96642	0.475594	20.8288	3.97997	17.7932	4.3257	-0.556841	3.48668	38.9405	55.2542	11.8375	1.46016	7.71798	99.0822	47.3675	9.83607	60.1943	101.936	0.83606	20.661	4.04673	81.2902	56.8577	1.43701	-0.565371	82.3882	59.576	11.8953	2.23555	-3.22034	6.61578	23.8848	97.4134
BRK	51.0533	9.16111	2.74608	0.682145	1.07703	103.006	-0.670177	98.1933	-1.00457	14.6058	98.2358	53.436	4.54351	25.3281	87.5963	41.291	52.3431	98.4175	102.781	5.45716	4.64418	63.0456	11.1852	100.637	10.9746	15.4976	49.1144	35.5575	19.2626	6.1752	-5.53328	7.74294	97.9253	98.9711
BRSK1	-1.79379	8.47973	11.9576	8.48691	-0.584925	83.8337	0.113159	31.962	-12.7641	12.4161	36.6702	14.4302	0.273952	1.38457	8.38886	5.05701	9.61749	23.1389	-7.3234	1.19625	-0.915141	28.7206	94.7002	-11.8301	0.395175	8.80354	11.5099	1.77019	36.4809	-1.74588	-5.90095	0.339476	-8.38926	-1.87188
BRSK2	-10.1451	-2.35494	14.1556	11.0208	-12.7894	77.3549	0.984378	24.2031	2.96383	8.27375	29.744	6.47455	10.9298	-7.93169	17.8937	16.186	8.36177	23.0726	15.8399	2.65354	0.485075	35.5408	89.9624	-0.438754	3.17164	5.27695	13.8669	8.21482	34.8694	4.13011	5.38394	6.82645	-6.02656	0.0746269
BTK	94.9476	4.39444	-0.621118	13.3645	-3.75314	54.0086	8.33585	-1.87637	3.89083	4.5961	60	43.2966	1.85014	-1.36117	96.8415	49.7027	10.3022	81.3729	99.87	7.45998	-3.71395	1.48011	58.9473	84.4529	-5.28692	-0.863191	53.0957	4.22005	16.5307	51.5705	17.7689	20.9755	2.08914	94.3927
BUB1/BUB3	5.51038	2.01599	-4.6199	4.14162	-3.43251	14.448	1.44289	5.67166	6.61246			21.5968	-3.40521	6.21673	-5.3842	-5.52068		53.6018	5.18782	-1.65665	-5.73908	-4.93381	6.39742	10.9536	-3.37346	5.69876	-0.908484	2.75881	19.3029	-3.94122		0.841683		-5.75308
CaMK1α	-4.28798	2.10693	-10.1522	-9.41545	-4.94332	27.6866	-9.16493	36.8555	9.34886	0.734095	62.6327	-6.75676	-5.33143	2.71678	-5.67868	-5.57655	2.01005	40.6513	13.8168	-22.4217	-1.63225	1.49117	16.739	10.09	11.7404	-12.8046	-4.71816	-7.62074	-5.54572	-4.36326	-2.05237	-5.46973	-3.18108	-0.157325
CaMK1δ	-5.00924	-3.42161	2.09498	-4.32414	-8.36906	61.8764	-9.65685	48.4226	1.0128	-4.10226	35.3383	1.43433	5.92673	-6.97965	16.1194	2.40977	-1.74002	39.2248	4.845	2.22583	3.44177	6.84939	69.0618	9.22466	17.1853	3.98293	-7.53536	2.32338	8.94625	-3.33874	-3.2967	-3.7329	-7.07491	-1.2612
CaMK2α	-3.43059	0.40512	-1.20767	-2.44749	-4.55132	86.4716	-0.60274	14.9377	6.92152	-2.77393	-2.14008	-1.12859	0.0128932	-2.54856	11.5309	0.356713	0.792864	36.074	-1.35327	-1.22374	2.73721	3.76053	88.3937	2.08594	4.91267	-3.95685	-1.58904	-5.67919	1.42988	-1.34247	-1.6537	-3.14155	-4.25335	2.02227
CaMK2β	-1.09366	2.1376	-7.13478	0.895247	2.18171	64.476	0.692201	23.1855	-0.487174	-1.59253	-0.276625	2.54413	-7.37065	4.22584	12.7168	-3.98998	-4.82897	23.5184	-2.55518	0.526073	0.902115	-3.2136	75.512	4.89163	9.3737	2.99773	-0.895247	1.19318	1.26504	-0.922935	0.737667	1.32903	-6.6447	2.43675
CaMK2γ	-1.85026	5.87087	0.455391	-4.05647	-3.64709	95.7608	-1.67531	32.4069	-2.30984	-10.2933	-5.46838	2.36726	0.463311	-3.2511	16.7861	0.732586	14.0816	61.5827	-1.82639	-3.36763	-0.126354	10.3631	88.9219	4.2544	5.04513	0.769361	-2.93392	0.397362	0.225632	-3.14653	7.18022	-4.85586	-10.4083	1.59747
CaMK2δ	-3.53357	36.5335	0.81448	-2.56162	-3.92534	100.605	-1.06619	75.9178	1.10199	4.00235	-0.230415	9.44706	4.12896	-2.79412	27.7602	3.02036	-16.273	83.9059	-0.826496	-1.48158	6.00727	35.8597	99.0477	19.2849	11.3832	5.41176	-1.05234	0.352941	1.35833	-3.00471	-2.18894	-3.08779	-0.235433	3.06103
CaMK4	-8.4231	-4.02897	-7.14002	-0.588305	2.66759	13.2554	-2.80033	30.272	1.92319	-1.40914	78.3598	2.43936	-3.01468	4.35343	1.071	-3.43118	-3.41959	18.1719	2.93348	2.47088	0.861386	1.55692	3.78553	2.49528	1.19802	3.93312	0.27062	1.71303	-2.54455	-2.03553	-5.44974	0.435345	-2.38095	0.732673
CDC2/CycB1	-0.397311	3.53504	-3.4803	2.94599	2.35924	60.6663	1.92308	2.49593	-0.107855	18.9418	26.0606	-6.23283	-0.937003	7.69681	3.63089	-2.34251	5.4126	25.7555	-1.02893	-8.79705	-6.74264	3.16239	22.4633	23.4006	10.0811	32.0913	14.5867	-5.56319	-4.17854	-10.5155	8.08081	-7.16039	9.84127	-6.87559
CDC7/ASK	-1.64157	-0.800434	-0.498511	0.039557	-0.213648	0.868268	-1.39768	-2.74047	5.07394	-5.4902	-5.75307	0.798935	0.485563	-4.27943	0.951703	-1.50848	3.81133	2.8689	-0.990368	-1.91192	-3.23691	-2.06526	59.612	1.64157	-3.54276	0.520518	-1.05485	0.278417	-2.10271	-0.039557	-7.95087	-0.857068	-7.18954	-4.07799
CDK2/CycA2	-5.19074	5.67969	-2.38901	-0.664242	2.2981	53.3231	1.62897	-5.31582	-8.42004	3.13008	27.7555	-12.7992	-0.853578	5.57099	20.2283	-2.61124	4.82094	26.5035	-11.8767	11.3554	-2.43511	1.87383	52.1178	-5.96395	3.54759	12.216	65.6492	-10.7338	0.889988	1.43919	23.5471	-0.284675	-2.88618	-2.81829
CDK2/CycE1	-4.81506	-2.55265	-9.57483	-36.988	-13.7236	29.523	-46.7283	-7.56865	-7.95564	-13.6534	24.4305	-16.4969	-10.9635	-8.61478	10.5177	-12.1121	-4.94572	16.9378	-8.26821	-32.992	-18.0223	-6.33465	22.4976	24.0902	7.11722	-3.81633	57.6424	-12.3156	-14.7927	-55.2697	2.5923	-36.2637	-4.95124	-14.5933
CDK3/CycE1	-6.14359	-2.7384	-3.88525	-2.70322	-4.56761	0.848061	-14.1533	-3.16566	2.15576	-5.67613	23.8591	-1.65931	-0.612728	-1.94959	5.62596	-2.31166	3.125	7.09393	0.485531	-10.3495	1.79412	3.00794	10.9083	22.0949	11.2941	-1.23306	41.7455	-4.33856	3.48529	-8.63101	0.160128	-3.47557	-4.34057	2.64706
CDK4/CycD3	-13.284	-1.89482	-9.84971	8.84028	3.25441	40.2776	-3.55434	4.63066	0.293849	6.95652	23.1824	-0.810437	-9.89296	10.1741	-7.42783	-9.59023	1.75983	45.7798	4.00243	66.1882	-0.744514	-6.99535	-1.10447	2.42172	8.77743	-1.58134	-0.979722	-1.18601	0.920846	-1.84552	5.62414	-1.91388	-3.26087	-1.70455
CDK5/p25	-19.0471	-12.4807	-14.0281	11.4254	-20.6146	40.3604	-20.0082	-22.0982	-6.75437	-7.71429	21.7047	-28.9957	-11.1835	-17.3129	-6.71351	-16.1615	2.1148	24.586	-5.18461	-16.9596	-21.8466	-8.72841	35.8059	-0.71855	-12.0797	-21.2383	42.8591	-19.2405	-8.52162	-11.398	18.717	-5.06729	5.2381	-17.2033
CDK6/CycD3	2.94154	-0.448293	1.98398	-0.37125	-0.0739372	17.7905	-1.64835	3.39597	0.128961	0.062383	64.5076	-5.92283	1.74985	5.97659	1.60197	1.91004	8.64947	3.88559	4.31712	16.5132	-0.0562746	2.64941	1.81159	0.620241	47.5239	-6.51646	-1.20285	-6.94819	0.675295	-3.48975	-4.23001	-2.12355	2.43294	3.48903
CDK7/CycH/MAT1	5.2531	-11.8081	-4.05683	0.83347	-4.86188	55.2349	-0.375878	45.0382	5.85397	58.1577	-5.05381	3.35164	-5.41436	-6.50355	27.4665	-9.6764	5.04348	30.9252	4.94355	9.36428	-7.97619	-4.87766	10.1693	8.56701	-12.0918	21.9687	18.8103	-1.47866	6.2585	1.69962	-6.08329	6.11211	0.137489	-9.30272
CDK9/CycT1	15.2674	-0.01881	-0.92918	48.6656	-1.46525	5.3483	-0.278487	0.19437	1.36059	5.14154	-2.18887	3.60304	-0.440765	-1.10787	1.78688	-2.51355	0.250313	32.016	3.45476	-0.382919	-0.39933	-2.47781	48.5987	0.721048	6.98184	7.29335	5.79021	0.112205	2.53768	-2.14667	-2.31395	1.53168	1.32871	-1.14646
CGK2	1.54515	7.52866	-4.8618	4.64676	2.57816	37.3567	-1.12785	14.2556	0.2732	-0.915222	-1.38107	9.88135	-0.774807	0.267331	4.41776	-1.65383	9.47752	82.0541	-1.76908	-1.95795	-0.443078	-3.13095	99.1087	11.031	1.58242	16.7501	24.5692	0.546904	16.2492	-1.64215	-2.6087	-0.162411	-2.26397	-0.388824
CHK1	-6.97847	0.287676	10.8236	40.143	9.39001	96.0282	0.208613	1.31774	9.44692	10.3943	-0.719424	9.98917	5.69135	14.3646	13.6621	18.3213	17.426	21.9625	10.1336	-1.07287	14.2857	11.5691	67.9473	10.941	12.41	5.59895	10.8032	3.56919	28.8565	2.72687	-0.719424	5.70705	4.1816	16.4616
CHK2	-5.77235	95.8916	-1.1366	5.47133	4.21461	95.6707	-1.51599	88.0283	-0.103078	9.38697	6.98723	23.3986	-3.49453	6.96788	31.2531	3.24038	27.3263	74.5802	14.1364	-0.482359	3.4622	41.306	36.0183	5.94905	3.00058	11.1163	9.96417	5.75249	79.7653	4.20342	-5.18407	4.17585	6.32184	3.88536
CK1α	10.4701	22.0522	-14.1152	5.0283	8.86587	10.5582	-5.42011	7.23329	2.01475	-1.36307	12.8137	7.86362	-2.03652	36.0955	0.210674	-10.3055	16.5975	12.9089	-1.92668	-7.37919	1.46474	-12.3244	3.51206	4.45888	2.21804	4.47379	-2.22029	10.9184	25.0889	-3.4175	3.03831	0.587723	-4.33705	-0.606822
CK1γ1	0.33411	-0.41181	-1.77478	28.1374	1.67848	1.12665	-1.87786	18.6558	2.66511	-3.51827	3.3052	1.84261	-1.45835	26.0164	-1.18319	-1.15567	2.32816	10.8381	3.67521	-0.946565	-4.73815	-2.29759	-0.48951	10.3574	-5.50095	9.63532	1.83206	-0.28151	12.0141	-2.68702	0.21097	11.4656	-2.02977	-3.72598
CK1γ2	-7.06864	-0.0410172	-1.5758	6.68633	-0.41601	-2.50205	-9.91712	0.505879	2.36533	1.40528	0.306748	-1.62537	2.73558	30.9486	0.857233	0.302553	26.2585	6.54694	1.01176	-11.968	-7.3278	2.14308	-2.44736	16.5846	-9.40171	-0.863833	-12.572	-2.30734	-2.46355	-1.65754	-2.14724	-4.18598	0.505902	-6.7999
CK1γ3	-14.7177	0.159156	-2.09751	9.91025	2.66741	0.829285	-1.64547	11.1493	6.17356	3.95078	3.01887	-23.129	-0.688618	10.1551	0.878582	-0.862751	-2.30216	10.7514	3.82811	-1.15931	-0.8324	-1.02105	-1.24812	12.6068	-1.18457	-0.557145	0.448766	-8.17648	12.3259	-0.991025	2.22045e-14	10.6021	2.13731	-0.464223
CK1δ	2.76296	-5.52591	8.67787	11.0988	-3.86188	-3.61674	-1.783	-6.15439	-2.63252	9.32051	8.51064	-6.63039	-4.4866	19.5366	-5.02045	-4.71377	-5.84958	25.0855	7.45879	-4.3953	-8.40362	-6.46297	-1.93288	7.49437	-4.55238	-3.45543	0.939876	-8.36933	-1.69698	-1.43746	0.364742	-2.17001	-3.06675	-3.9122
CK1ε	-10.4896	4.47825	-2.47893	2.13503	-3.4829	0.660526	-5.82804	4.86608	2.44213	4.10397	9.81013	6.54598	5.15617	14.5141	10.3619	-0.334655	-5.95238	5.549	49.5516	-6.49163	-2.18905	0.582548	3.90862	18.4644	1.32196	5.37846	-2.8996	1.79719	2.35963	-0.360646	-5.37975	0.504905	2.46238	4.32125
CK2α1/β	5.33592	-3.17768	-1.51913	-3.77358	-4.22089	8.50863	-3.1794	-8.31966	-8.97608	-6.39498	-0.0641026	-3.95492	-2.4692	-0.974813	1.83582	-3.13227	-1.13314	15.3586	-11.1144	-4.12801	-2.36511	-2.10302	-5.60446	12.109	-2.79801	0.256148	-2.52267	1.0041	-1.81607	-4.88898	-3.39744	-4.11759	-5.39185	-1.99557
CK2α2/β	9.56219	-3.09783	-1.52585	-1.79269	-1.88754	-4.09357	-0.769938	-6.03762	-5.91117	-10.2004	-5.86538	1.10836	-1.46934	-3.75247	1.96666	8.92908	-4.25963	23.4878	-7.36526	-2.17191	-3.09564	-2.40746	1.99147	15.5366	-4.80607	0.601344	4.28637	-0.613135	0.6384	-2.03402	-5.28846	-2.25236	-6.55738	-4.11949
CLK1	-8.1067	43.2921	58.6504	90.6534	-1.70425	100.312	7.95666	99.4014	-0.279908	13.0936	7.04574	18.8058	-0.41889	3.10438	60.062	5.57181	23.0624	96.4152	-7.28977	9.7625	5.30705	-2.47317	94.4047	46.5012	5.14278	13.4909	31.9361	0.972521	18.9538	5.17675	-0.618047	7.04827	4.81682	4.66262
CLK2	-6.97023	14.3117	85.2884	11.1126	-2.25177	91.2434	6.6842	99.3135	0.14711	-5.78085	0.875274	-0.600049	3.58139	0.464651	28.3294	5.42569	-7.19794	38.9664	1.28196	14.7938	9.27544	2.49482	81.1278	37.7793	6.37205	3.47783	9.50733	-4.0289	-2.29959	6.80875	-4.814	4.89898	-12.5108	7.61819
CLK3	-14.9052	-2.36019	22.1862	3.76277	0.514485	32.5386	8.40818	36.4909	4.20034	-5.07901	16.7693	2.49686	1.78091	4.4404	3.45892	2.55659	0.9375	7.06658	1.52812	11.6754	-3.43302	0.641127	13.113	6.18449	-1.00867	17.5879	8.93465	-6.73681	0.424704	7.4791	-0.0684463	5.41963	-13.6569	-3.73385
CRIK	-5.14365	2.31034	-5.56431	-0.547517	-3.43901	3.3298	-4.74514	-0.933404	0.417053	-11.8794	-2.73733	32.1079	-3.15876	2.71501	-9.37117	-0.36784	26.3217	74.5882	-0.165497	-2.55508	-4.22209	-1.2203	1.31736	7.20906	-4.34411	-1.08618	-0.417156	19.8854	-4.7468	-2.33346	-4.2516	-2.4899	-5.96927	-2.4039
CSK	6.97065	5.75771	-0.289436	2.5747	-1.10512	8.63282	-9.07502	2.92752	5.62294	9.28309	98.4721	17.6149	1.85502	1.57874	8.41994	53.9929	13.3106	23.423	103.467	2.24094	-5.12027	1.11827	57.7643	9.4714	2.2788	8.617	0.34965	49.9643	1.7724	0.079466	-2.82659	6.03942	75.6434	82.0087
DAPK1	-17.4542	58.1653	-3.07703	0.0958117	1.68555	83.2538	-2.8196	5.83346	-4.15576	-4.03691	-0.539568	-7.2366	-3.23483	-1.02568	16.3319	4.55458	7.25806	70.9786	-3.80175	-3.07966	-3.82831	6.54856	56.8108	29.0596	-4.24884	-9.18635	52.5185	-9.75628	25.5075	2.58691	-5.93525	1.60142	-0.11534	-1.92865
DCAMKL2	4.63424	7.11927	6.51777	3.64598	-13.2622	51.514	-1.61334	85.4089	-9.21251	49.2199	18.9379	1.4219	7.51285	-11.6701	16.4575	6.67256	2.38095	11.1418	-9.44758	4.24756	0.700623	74.2164	7.66777	-6.71629	26.9795	3.24703	1.6498	2.03735	1.22331	0.902379	-2.40481	3.59129	-3.5229	0.322509
DDR1	7.80464	15.8568	3.80335	95.7713	-0.162158	83.64	-2.22045e-14	49.6329	6.37133	97.1648	96.258	100.501	6.05882	0.44225	98.9017	100.346	98.0639	98.7165	37.1672	96.444	41.2922	24.766	98.4242	46.0413	40.7804	84.129	97.5973	89.6541	88.7574	4.72529	-1.99045	9.06615	51.6475	3.05453
DDR2	6.23227	8.02744	5.4461	98.3272	-9.76716	59.8162	-1.04401	12.2952	0.56734	88.1356	100.459	93.2154	8.37904	-6.87899	99.6362	100.274	58.5	98.8317	17.342	63.0561	25.6666	20.525	96.7865	25.4202	4.91232	89.925	101.969	98.1779	73.2164	-0.118638	0.611933	9.5385	68.7853	-3.23084
DYRK1A	-4.56679	3.94831	6.24901	57.4772	-8.30565	37.6332	-0.901826	1.13203	-4.98647	-12.5848	15.9079	9.46385	-3.47519	6.16464	-3.17988	1.96699	16.4384	17.8762	-3.53968	-4.08676	-4.70481	-4.39276	93.2741	0.712353	-2.67215	8.16565	-2.91096	1.40205	6.30353	-3.48174	-1.23192	-3.25342	-17.7668	-4.37364
DYRK1B	-19.4907	1.96429	8.17118	47.2507	-7.17402	40.9987	1.71008	11.4881	1.93783	-3.06675	28.5949	6.75952	-0.692473	-3.42082	6.3015	1.24645	14.0216	33.7157	1.91138	-2.30203	6.28512	-2.79759	86.1574	5.20503	6.29659	4.36979	-11.8258	-2.37608	1.42218	-3.17022	3.33516	-1.89424	-1.74384	5.39053
DYRK2	-16.0119	6.24223	6.86172	56.1607	6.51863	29.4905	8.21429	6.4143	-2.74352	9.64506	5.96886	37.7454	7.66225	11.2075	11.379	32.1357	29.428	38.6256	-1.82583	-3.42857	6.29545	4.34575	34.5378	44.6324	11.5193	24.3399	-0.767857	4.57007	65.6908	-2.69643	-0.0865052	8.44643	1.00309	12.5526
DYRK3	0.352973	8.4442	9.7292	48.8019	-3.2983	3.23106	4.50383	-2.12327	-3.62205	13.6209	-5.67901	17.6861	-1.95205	-1.06146	-3.00834	10.3609	35.9725	27.3047	-3.92615	-9.79802	-6.10241	-3.41221	14.3416	20.6951	-2.68153	8.07726	-4.31564	-3.76549	18.5058	-4.70455	-9.87654	1.06637	4.76731	-6.20172
EEF2K	-12.1396	-0.236998	1.92965	-1.20513	-6.00426	2.52798	-0.628766	11.2837	-0.684661	-4.596	-2.42857	0	0.761891	1.01823	3.25406	-1.81572	1.23596	-2.7177	1.14549	2.54126	-1.92534	-1.73028	-9.42725	-0.355497	-3.26279	-2.24815	1.23133	-2.06318	-1.54321	2.39717	-3.42857	-2.79015	-5.04077	0.514403
EGFR	19.3852	15.7203	1.97437	24.9795	8.71381	96.6365	16.571	57.1429	8.1736	6.39481	18.3126	102.507	5.90413	8.63787	17.1239	9.15045	105.687	85.2115	89.1139	16.5299	4.81008	9.49217	68.8849	76.1664	-1.94062	15.29	48.0722	10.1618	0.116105	25.6358	-0.0958773	94.8523	6.95088	92.0717
EPHA1	-0.591175	5.62154	-3.58619	51.2052	4.03059	61.149	-3.32215	45.0691	0.612673	96.9578	44.4683	79.0213	-7.06904	5.41546	87.5878	100.114	73.2748	98.7998	49.82	-1.95976	-2.54209	73.2224	9.37282	12.8231	-4.18107	7.36561	65.9505	78.293	79.0612	-2.2532	-1.61117	20.7608	-8.83219	-0.68012
EPHA2	-3.60025	1.88477	-5.80027	60.4186	9.38331	-2.15563	-1.0465	5.68817	2.78765	86.1707	6.77966	13.7084	-6.35606	9.04038	36.7587	76.0894	19.4614	66.0859	6.82806	0.317923	0	44.6934	3.36324	3.35196	-3.68669	7.58621	62.4056	99.5644	49.2083	-1.40416	-8.53302	2.0665	0.715308	-1.86148
EPHA3	-2.0674	3.24554	-0.172693	21.6972	0.248246	0.198244	-8.78887	1.73888	1.98811	18.5752	18.2648	11.0833	0.474906	3.85321	30.0054	81.7161	10.7807	29.8405	3.80062	-0.310952	0.701928	4.3497	8.21863	0.753328	0.533861	2.10614	31.8105	87.7177	49.4414	-7.9358	-6.13177	-9.8103	-7.5233	-0.0988631
EPHA4	-3.03344	2.99463	-4.96677	34.8873	7.56401	3.05931	-2.76639	1.32592	2.96876	58.1028	12.087	37.8832	-0.264648	10.309	27.9727	84.3242	51.3514	35.7461	12.6318	0.256148	-0.0271444	25.3631	2.15381	3.53793	-1.83225	1.65373	51.5241	101.285	58.089	-2.57428	-5.30435	-2.34375	-1.97628	-0.203583
EPHA5	-1.17483	2.66826	0.272196	41.2873	-2.36068	3.81322	-12.671	4.89845	1.26444	70.8455	29.8413	33.721	0.786895	-2.32109	53.1377	93.7296	58.8313	51.8203	25.7268	-7.92779	-0.0881316	38.1124	8.34329	-0.189168	-2.02703	4.01891	73.8955	99.5745	69.1246	-12.4019	-2.66667	-12.5813	14.2857	0.0391696
EPHA6	-2.36598	0.529292	5.35327	7.28328	2.33711	19.5114	-1.97529	29.3915	1.59692	99.9376	88.0322	97.6982	5.71155	16.5014	43.7885	78.3994	84.9138	94.4373	92.6352	28.4685	-0.584855	76.2081	18.679	2.32979	-3.12949	18.3321	87.1934	99.2693	98.1326	1.00169	-2.5071	2.1906	37.3908	13.9647
EPHA7	-3.5413	1.57638	-1.30098	12.8524	0.59775	20.8592	-0.308705	4.64032	1.754	74.8201	12.9918	38.042	-2.14487	5.11017	43.6474	2.3324	48.6293	79.4114	6.99378	-4.14694	-0.151553	55.5321	18.5391	2.35346	-0.618843	6.37838	68.2548	53.8739	96.4385	-1.7802	-4.82554	1.07018	-0.639488	0.757767
EPHA8	6.50681	11.5137	-6.59313	73.0514	2.6846	6.54907	-14.1013	5.71459	-5.33432	81.5476	34.7558	58.6152	-7.34865	15.6795	55.349	91.3317	54.0659	65.7847	54.6847	-9.71232	-9.46255	6.29092	6.50681	-7.78494	-6.18011	6.32668	84.4234	100.95	44.7036	-12.3678	-8.36609	-13.671	7.19697	-7.83937
EPHB1	-1.40339	21.4687	8.37843	64.6882	2.08947	36.312	-1.62785	26.2206	4.09269	92.7283	11.7495	45.381	9.55676	2.93896	62.1429	91.2174	41.4562	87.034	11.8081	2.80491	-0.530813	68.103	11.3251	13.1266	-2.99068	11.335	58.0766	92.489	98.2781	-0.926622	-8.00516	0.250438	-1.62885	-2.09736
EPHB2	-0.110681	26.7344	1.07053	30.895	3.33453	10.2933	-4.95603	14.5495	1.52941	56.8571	-3.3761	51.1381	2.01301	5.43462	64.0014	82.7383	45.5032	75.3252	27.8312	-0.113813	-0.57377	14.4394	4.49766	2.7972	-0.79918	8.281	35.075	74.5515	63.8832	-0.444904	-8.23768	2.14175	-2.11429	-1.06557
EPHB3	1.64074	1.91936	-0.581946	3.1202	3.27514	0.727498	0.191816	-1.02159	0.897763	4.77408	3.09033	1.9805	3.97889	3.85708	8.33672	29.0161	8.96657	7.79824	2.92547	-0.971867	-0.505747	12.9517	1.53239	-0.046436	-2.51724	-7.31858	-0.434783	58.9664	-0.597701	-2.89003	-5.46751	-5.67775	2.04604	-1.32184
EPHB4	-1.45174	11.4704	3.18925	34.1258	-0.0401163	9.36453	-1.19526	3.72773	-2.40893	83.1226	8.49624	61.8539	3.23939	-0.671949	72.9616	88.4866	62.9172	74.3084	26.5195	-0.369445	-2.17075	43.4159	1.19649	-2.94071	-2.94282	-1.91778	55.8079	90.4442	73.0558	0.673693	-3.38346	-0.488971	3.72946	-2.81974
Erk1	-2.3771	1.4071	-0.812746	-1.84107	-4.32174	3.68241	2.84283	35.3811	-0.916113	-2.07778	-1.6226	2.66362	2.77366	-0.941753	-0.52893	1.21267	-2.85459	1.85185	1.74241	-3.9935	-13.9593	2.96717	-0.652656	-3.17945	-8.52081	2.66362	-2.99174	2.79046	-7.44021	-4.67037	-1.14183	-2.59916	0.0532765	-9.3357
Erk2	-2.01998	1.10181	-0.75305	5.02518	0.030122	10.4888	1.1386	57.1429	-6.38401	-4.57579	-7.99159	-1.48381	0.060244	2.55033	-0.572318	-3.0624	-6.25528	-1.14658	-6.90251	-3.85373	-5.99461	0.391586	2.13881	-9.85147	-1.60403	-3.52968	0.22991	-2.42806	-3.9808	-4.40114	-4.94217	-0.547405	-4.57579	-4.90575
Erk5	-2.11582	-1.23915	0.366881	1.77817	-0.0500292	96.0212	-3.08099	94.3859	1.7112	45.3	0.144161	0.171527	-0.633703	8.58834	13.2911	-3.43534	18.7403	37.7514	3.88603	29.6303	1.25827	38.2556	-1.27287	9.635	96.8059	9.65227	0.774648	0.452206	4.01678	2.35915	-2.54685	-1.07394	0.70855	3.75867
FAK	-1.38955	17.4957	3.68908	-2.50346	-1.33406	99.1947	-5.86699	100.363	-4.14759	90.4217	13.2458	-0.574935	3.82521	-3.14457	96.025	4.24721	27.6471	80.7687	5.04237	-4.48472	4.09802	100.79	27.5488	81.2359	5.31635	29.9548	13.7153	0.833333	10.4527	-1.90447	-2.40832	-1.16726	-3.55422	12.9171
FER	-2.53877	65.5822	-1.85625	1.70573	4.70537	101.87	2.19519	99.5895	4.01338	89.9587	21.6974	6.35031	-1.81308	4.96439	98.8273	3.38154	5.96708	98.5206	18.0146	9.4779	3.72317	99.7482	101.247	77.8656	-2.86173	21.1445	74.7998	32.2121	35.1	1.21626	4.28044	1.34975	10.8666	0.0146007
FES	-6.35263	22.6796	-3.46913	1.65145	6.26641	99.5982	-1.91417	99.2023	1.67113	86.3599	2.29244	1.55812	-0.806205	7.14591	68.0144	0.635192	8.49582	75.6978	0.681262	20.3428	-1.06754	99.9084	90.4332	42.2324	1.55375	26.8356	7.83185	22.5872	15.1253	-3.30289	-1.54895	1.73902	18.1594	1.41634
FGFR1	-2.27899	5.37392	4.28741	40.8304	2.00361	94.5754	-0.661506	10.8435	-1.33363	17.2253	10.2899	7.70738	-0.103279	4.26543	89.7157	100.658	7.30932	54.7146	70.8739	99.817	-2.0773	3.4281	93.2137	3.50571	101.685	45.4967	96.4532	92.1637	96.7859	-1.40746	-1.44928	-3.23716	20.8106	4.52666
FGFR2	-6.21521	2.03769	7.07646	62.4572	4.56411	97.2218	6.85549	14.846	-2.80374	27.139	4.2095	15.6461	4.93259	3.94439	97.1359	98.3753	13.1379	60.95	81.288	98.4846	-6.46469	5.31781	97.4159	5.56151	98.1225	61.9859	97.9073	71.6083	99.5306	1.10049	-2.64317	6.04366	10.1362	2.53894
FGFR3	-1.31456	7.72215	3.38762	40.8518	1.40427	93.1901	2.02349	20.5373	5.10739	42.8571	4.27258	25.8254	0.28954	0.984437	89.9747	99.6598	13.0719	76.0579	81.8548	102.335	1.36331	-0.405356	91.4661	10.3513	99.5504	67.8841	95.7266	52.2989	94.6338	2.7593	-5.67875	2.63195	14.7392	4.61204
FGFR4	-8.97193	4.04021	8.79749	41.3241	4.66033	82.4734	7.62125	69.1958	-0.0569044	0	19.2623	-4.41858	4.9179	4.22569	37.8703	99.8149	3.39977	15.0741	36.912	99.8152	5.94773	19.5187	38.107	11.305	100.075	7.41886	85.2348	10.8737	83.5236	6.37413	-3.14208	4.20323	4.92308	7.50976
FGR	2.9067	39.9705	1.95255	66.4536	0.0227041	52.4144	-1.79471	4.87576	-1.28592	69.697	81.8693	58.1687	3.23533	1.3736	94.6986	65.3309	47.0238	96.3923	99.0155	45.63	2.55144	21.6256	92.6797	5.61248	17.0253	5.63991	80.9834	49.5034	51.1581	-0.331899	-9.06535	5.97419	93.4959	37.0018
FLT1	-1.1385	2.2311	2.92054	75.7776	9.61538	74.1679	5.70094	16.3889	-0.348896	52.512	61.9663	20.2116	7.43449	17.2739	75.9383	99.962	14.1391	95.3829	72.5704	90.7657	-0.638162	3.17413	95.3129	9.41101	94.5392	81.6634	95.5679	91.1518	98.3317	4.22064	-2.75281	3.21614	24.5215	2.22445
FLT3	3.26654	77.6862	6.06828	100.103	11.8011	100.665	50.1778	75.5463	-0.393195	55.2113	40.6498	56.082	10.259	9.42319	101.054	22.2778	57.8783	99.1785	62.7675	63.677	6.05356	13.2961	100.499	84.4688	8.08986	54.7003	100.745	45.9308	99.2143	51.7949	20.3645	48.3427	10.2817	22.023
FLT4	1.40759	39.4906	4.84038	88.3153	3.36881	99.2571	10.1469	75.1494	-5.71971	48.0019	84.8293	34.4853	0.522955	16.9292	84.962	100.772	18.7566	98.871	90.8228	92.2147	-0.956511	4.84038	99.0672	39.9821	98.8777	65.9236	99.1624	92.9728	100.548	7.66168	1.5122	13.456	24.0253	6.33848
FMS	7.76183	18.8198	14.1686	95.0372	7.10452	100.276	13.305	54.6518	4.93355	91.8337	14.7776	8.55226	2.22197	7.67011	86.3681	99.6422	7.69231	104.098	18.5221	96.4315	-4.31124	32.3599	95.428	46.9644	93.0088	95.0029	93.9501	70.6311	79.4795	8.50762	-4.16069	11.5798	6.16184	-6.84878
FRK	47.479	52.5039	-2.26466	24.8665	3.04208	103.867	-1.97926	84.9511	0.866061	26.3362	81.39	70.1569	-2.26466	8.33192	96.4509	43.1638	60.1757	94.8499	99.5284	43.9208	-0.307942	97.3804	69.5335	34.1365	9.74068	5.43997	82.4537	87.3124	12.8201	-2.95319	-2.93436	-2.16777	62.0991	82.0259
FYN [isoform a]	5.8384	15.0952	1.51694	56.8373	3.7575	69.4856	-2.00025	3.92092	0.257868	41.9954	94.4664	32.1971	0.670026	6.21248	95.7708	59.3	24.0602	83.8716	92.7466	39.7157	1.82019	15.2819	78.425	0.720709	9.16246	-8.69421	82.2242	22.6739	24.0807	-3.52246	9.28854	2.2896	81.2065	31.3246
FYN [isoform b]	-1.24775	11.5787	-5.63069	2.92567	4.04147	55.5039	-1.20469	-4.03934	-0.687322			36.581	0.599905	4.62032	94.8166	46.6032		85.5445	86.7717	42.788	1.63608	4.13619	83.2188	14.1694	14.4152	1.29942	30.3216	33.244	10.4134	-1.85006		-1.06486		22.2971
GSK3α	2.47267	4.35711	-2.63784	3.05036	-2.80335	4.19053	-0.491994	15.4034	3.42009	-2.55608	29.1572	1.44854	-1.90338	54.8981	-0.424123	13.0651	-5.75461	7.47569	2.24362	-1.67278	-6.65188	-2.35854	87.4701	14.5914	-5.29933	3.07942	61.9018	-0.0405186	30.0443	-1.05555	1.59453	5.53717	25.0913	-7.10643
GSK3β	-2.38579	2.3692	-3.83899	-5.31607	-1.83874	-1.8132	6.5418	-2.50197	-2.44388	-2.10526	2.48125	11.3962	-0.807554	92.2723	-1.60268	3.51596	-6.31136	4.20217	-3.99568	-9.13097	-11.4328	-4.69624	77.5445	-4.15335	-7.27543	4.44423	50.7919	-0.348567	40.1633	-7.85016	-15.4068	8.0292	8.02005	-9.20564
Haspin	5.30514	7.78261	-4.19801	58.8367	-14.5677	9.13159	37.1318	7.05623	8.04203	7.16204	9.16745	12.5393	1.93319	-5.23336	-2.24056	2.30527	-5.86081	35.0142	2.52935	-1.39839	-4.46163	0.865486	30.871	13.7752	-3.70315	6.52402	0.148765	1.87042	-4.62522	3.64475	4.86436	0.892591	-3.04387	-1.75491
HCK	0.452074	42.9348	4.5624	52.3986	-8.20818	77.6834	-1.62548	15.175	-3.62881	25.8936	57.0517	56.9114	6.29208	-5.46349	90.9529	80.1605	44.3327	87.0629	99.664	22.281	-2.9897	41.7556	95.1066	0.0488729	30.7607	2.9021	82.2387	60.4779	57.6348	3.91172	-2.84388	-2.90736	30.0238	38.5007
HER2	16.1106	-1.76571	18.75	11.625	1.43058	69.1387	9.12635	8.77983	-1.21367	-0.714286	50.3699	100.338	18.6562	4.46764	21.7753	17.0028	40.7068	15.0152	100.313	4.73153	-2.31936	21.0718	62.7172	99.8011	-3.92507	5.77058	20.0957	5.51411	2.47228	2.87081	-5.36375	101.418	1.96429	69.2749
HER4	77.6058	34.1676	1.93931	25.222	11.0507	99.3578	21.1545	51.0291	11.1148	-17.5127	23.1873	103.123	-0.702165	13.7257	32.1993	22.4191	103.863	82.9106	98.6004	25.6661	9.76294	10.9671	76.9636	96.4268	4.88147	12.9994	53.4458	36.1287	7.42358	32.5222	2.34139	94.1918	11.1675	98.5808
HGK	-1.41692	20.3192	2.6558	37.0981	3.18485	17.8135	2.68151	10.4852	2.27205	7.06468	7.3508	38.5174	1.98921	7.5865	6.95165	16.2946	41.7939	95.7949	-0.0248583	14.6801	2.53394	1.04751	96.7038	80.4166	4.63801	23.9623	3.09056	13.2871	6.74208	1.57937	-3.71179	3.64731	26.1692	5.63348
HIPK1	-14.5621	2.5186	9.15251	1.57596	0.440025	11.3795	-2.58384	11.6085	6.61706	-6.93467	70.4409	3.42298	0.739241	5.59711	10.6134	2.28813	5.47667	70.8106	4.25873	-4.25142	-3.73354	-1.7073	11.5398	33.7951	1.47377	4.72071	13.2857	-5.26613	-0.334054	0.0183251	-3.70741	10.7752	-4.72362	-3.57634
HIPK2	-11.4447	8.03713	3.33455	3.87361	-4.27335	9.00065	0.26441	37.4714	1.68028	-6.53344	42.4149	4.75926	0.115825	0.237747	7.80907	6.18752	12.0732	84.1877	2.00928	-0.912216	-0.390462	-1.95684	33.7465	40.3149	2.55195	4.60358	11.4093	0.0333593	0.223121	2.71021	0.154799	5.89635	-5.14988	-0.320736
HIPK3	-12.0352	3.19072	7.17788	-0.0710353	0.0241138	6.91723	-2.98348	7.47701	2.7429	-5.98749	64.9406	3.75073	3.4965	5.6346	5.07194	4.97548	9.92908	66.1705	1.67133	-3.7116	-4.15935	0.50639	24.3822	19.8401	0.4563	3.51722	8.95045	3.88208	-3.0537	2.98348	0.0848896	2.27313	-5.98749	-2.4219
HIPK4	-9.54282	26.2195	64.0382	45.5642	-3.76775	80.9343	3.67341	36.3213	1.79677	31.4754	92.2136	84.7882	4.88461	58.5481	14.0349	13.3082	82.8096	98.9983	2.59533	5.91905	6.21708	2.62397	62.767	92.2207	28.3365	51.5741	44.4829	98.2398	21.0918	9.7588	2.78087	21.3612	-0.437158	7.19332
HPK1				15.2735			0.392157													64.9123	1.0353				21.0285		50.0103		8.43517	9.49432		4.16925		1.74813
IGF1R	0.465792	9.87178	-0.261476	3.40898	4.47414	98.9432	5.69844	102.99	5.89502	79.931	-4.96215	3.28909	1.51075	6.61437	97.5983	1.1718	5.76923	98.6873	7.44766	17.7408	3.60427	79.0238	24.2062	83.9978	7.14352	17.2108	9.8235	3.33753	2.87041	5.56732	-9.8402	2.30963	10.1379	2.98189
IKKα	-1.44501	-0.856302	6.29946	2.4147	8.64198	-0.856302	1.10236	-0.909821	1.07038	-1.77531	3.01495	9.52381	8.26211	12.314	8.32542	11.7442	-9.45455	2.1645	4.33503	2.62467	2.44965	11.5543	-0.107038	5.19133	-5.93359	-0.378788	-1.52231	1.08225	-1.36091	-0.15748	2.62904	-1.67979	-1.88627	-9.90746
IKKβ	-6.97806	-4.89688	0.111021	0.0490004	-4.13737	-4.21885	-0.588005	-7.00631	1.29014	-4.78886	3.7062	6.29853	0.466287	0.64392	-0.451484	2.87914	4.33996	5.65759	-0.348432	0.303802	-1.75533	-0.37747	-4.05876	-1.31839	-1.21798	5.12757	31.8405	21.4594	-2.14938	1.34261	0.74124	1.00941	-3.30866	-0.689593
IKKε	1.45936	1.59407	-4.31487	-0.262279	-3.10204	23.5294	-5.46018	6.42119	-3.34531	7.48503	15.0147	-2.10882	-0.559767	-3.3586	6.90379	-2.54227	3.87183	10.4742	-0.696004	-6.17549	7.15869	-3.77843	96.6547	7.8132	8.48848	-1.8059	-4.95947	-5.20797	20.0576	-5.67477	-3.63101	-2.62279	-9.18164	6.00621
INSR	-4.66536	83.3781	-2.57015	4.71033	6.14772	100.708	4.49576	101.93	2.4766	84.2399	7.51055	1.80841	-0.398054	9.13558	94.3191	-0.270284	2.62881	99.7313	9.50696	17.2576	1.95195	64.0769	34.917	86.4757	9.11912	17.1334	9.69654	1.55007	1.51151	3.15725	-30.2954	3.02442	17.4338	4.03403
IRAK1	-7.06499	91.6352	-5.29707	8.41846	2.18978	68.7002	35.244	8.61635	0.649895	92.3383	-47.8539	76.3381	-8.05297	20.577	15.6407	-7.1582	61.8132	83.7578	-10.7966	7.3969	-0.211119	9.80673	10.1677	6.81342	-5.31316	-5.16796	9.44003	-5.68475	4.89092	-2.70526	5.75342	4.63488	10.1007	-2.53343
IRAK4	-6.54672	18.7617	-3.76697	11.6743	1.25566	46.0437	-0.568594	1.29972	-4.30832	7.9857	-4.6811	18.8706	1.12818	-1.14093	7.9355	2.67066	15.7833	79.1491	-5.09056	-1.22187	1.66753	-1.47237	26.9812	-2.75588	0.219752	37.179	-0.786354	-3.46237	1.90021	-1.34285	-5.03218	0.834745	-4.29082	1.03413
IRR	-0.869705	57.3764	7.19842	2.37117	-5.48009	99.0981	4.19992	101.876	-0.402641	96.1616	10.3448	5.7946	6.85011	-3.65339	100.135	9.7914	-14.5631	99.6551	11.5397	34.3665	1.68787	78.3544	25.5114	77.1541	7.80333	14.4865	10.1976	4.50116	3.06588	2.14645	1.34933	3.03758	21.4141	2.6908
ITK	0.87142	16.7642	8.7457	18.5148	1.60947	94.8263	5.21749	11.2188	3.90615	62.6106	48.8	24.2661	9.23673	3.48628	99.0398	9.43314	1.42012	91.6297	93.0957	5.88235	12.9025	14.2997	73.0835	62.0658	1.96896	9.10863	59.2968	1.24047	78.7931	4.28217	-7.55556	1.30719	3.0236	34.2715
JAK1	-12.9131	-10.1727	-7.67027	28.8483	4.93316	31.4815	2.60902	-4.50922	-8.52848	46.6912	5.70265	0.44428	0.0530448	3.59644	90.9081	-5.23021	4.61216	24.0281	-9.5416	2.57175	0.894234	-0.816889	97.4672	-5.87112	-2.65187	6.84932	100.857	25.6201	5.78168	2.45993	-1.83299	2.72083	45.9559	-2.97564
JAK2	-9.13783	-3.10261	1.84551	52.3773	-0.408885	90.0486	1.57983	-5.34912	1.19611	98.1163	54.5117	0.855545	3.29318	2.61907	100.354	2.75169	4.92611	95.13	0.4068	2.1115	45.952	69.0574	98.7675	4.14693	-2.84858	35.0225	98.4202	62.6741	27.4613	-0.0151906	1.75159	4.51162	18.2271	-0.374813
JAK3	-0.999896	5.58275	0.446849	63.5259	-0.364534	96.7608	3.31852	2.84345	-3.24966	76.7929	22.4422	28.0263	2.99859	2.28128	97.4718	0.493885	3.91892	91.0532	90.9176	7.31852	5.99349	6.62041	100.281	97.0316	0.2002	40.2254	95.7037	6.90384	27.002	6.01481	5.77558	4.65185	9.58904	9.65966
JNK1	-0.882322	3.24227	-4.83621	-4.54367	-2.58771	39.747	-5.58615	9.08898	-3.15722	0.431406	-1.12254	1.07278	0.533049	5.92169	-0.261679	-1.44408	20.672	28.8389	-2.32805	-3.18647	-3.54727	-0.746269	9.2378	-2.11545	-4.29695	-1.87211	-5.01574	4.12284	-5.39404	-4.74036	-4.67727	-3.71755	1.46678	-3.49241
JNK2	-1.85197	-0.467799	0.493871	1.09961	-5.46829	50.0929	-0.668392	16.0525	-2.50561	-2.59002	-0.946832	1.27403	2.00524	60.7343	6.86065	1.91003	47.9356	44.3451	-2.82602	2.80293	-0.671457	3.24289	7.72188	-2.74912	1.27223	2.50335	4.87279	34.5999	-1.07198	-2.13454	-4.73416	1.46615	-0.0631712	-1.178
JNK3	-0.893471	-0.532646	-12.1775	2.14497	6.67678	52.2509	5.01109	15.9966	-0.412371	-1.86992	5.59242	0.337838	-9.65478	58.7822	-1.68816	-10.8308	28.4575	52.1718	0.979381	4.17899	-7.23534	-8.55463	15.378	1.89003	-6.98781	0.453668	5.95414	9.66216	-8.47296	2.14497	-2.36967	1.12796	2.84553	-7.63519
KDR	6.81393	17.9725	7.82	71.4463	14.7359	86.3254	4.06312	58.2288	12.767	36.1748	34.5916	42.2275	10.5884	21.5088	88.0631	100.005	30.8197	103.579	83.5358	92.0353	5.94525	6.81888	99.713	45.6287	95.9153	80.8017	95.4399	111.315	98.9842	2.42296	-0.549073	4.28678	13.1089	10.8319
KIT	2.89328	0.373032	5.15619	100.401	-0.242053	50.7142	3.8636	12.0189	-16.8683	16.4354	58.6111	-9.84779	-2.4251	-1.42948	21.0404	92.5512	36.3168	71.3396	-4.53098	26.2341	-4.88889	4.21538	96.8156	-12.6194	22.7183	86.8317	82.5833	110.85	54.0362	-2.3984	-0.648148	-1.27333	57.6307	-4.46512
LATS2	-7.44604	1.69065	-1.02673	1.46632	-2.89899	49.3741	-7.16359	2.29496	1.46043	-6.14035	0.569569	10.7507	8.1987	3.48785	17.5751	5.63189	-4.06886	44.1754	5.44604	-3.6658	-3.03863	6.02446	85.8633	4.88489	-3.12545	4.14192	7.43852	-0.411147	-5.39719	-3.37559	1.87144	0.168016	-2.2807	-0.0723484
LCK	6.83528	19.6906	4.94312	92.3603	-0.655113	77.2366	4.2316	6.04097	-3.07274	98.4433	82.6456	92.8114	7.23006	1.3936	91.3704	93.157	64.6067	96.8318	100.251	90.5359	1.13836	24.1915	90.6982	3.61622	16.6882	51.3137	98.3656	99.2888	76.7516	7.62701	-7.03883	19.6757	80.6523	66.7527
LOK	3.37479	29.2424	-7.31822	54.4515	3.41517	95.9729	0.859171	74.8717	10.3505	98.0583	33.0558	85.6366	0.58231	1.24331	28.0138	4.28077	80.8	99.6492	24.1454	34.4415	5.29655	87.1734	98.0778	41.5239	4.70345	25.0438	13.1615	52.8586	39.6414	4.80638	12.2398	6.4251	-0.970874	4.82759
LTK	10.0605	98.8698	-2.8522	51.1139	0.410545	100.202	49.3564	100.383	2.84561	102.486	2.67152	20.6993	0.216076	0.605013	100.475	16.7459	20.2913	101.084	2.76488	60.198	15.8154	101.005	89.8991	96.5288	1.66422	9.77435	54.8144	0.636729	-2.93071	53.1312	-6.92168	49.0099	2.60116	0.209336
LYNa	1.93398	32.3392	1.8001	86.6425	3.75932	51.0697	1.11675	16.2015	-1.80646	42.2074	89.8137	79.0715	0.82546	4.8732	74.4306	95.4649	68.6369	87.9039	98.6894	84.467	5.0141	20.5768	89.8767	0.63049	66.3602	23.5351	92.3133	85.4696	60.1692	6.52647	-1.73913	6.72951	72.9766	55.8416
LYNb	-1.9722	14.5296	4.66829	83.437	4.22421	42.9939	0.304607	10.9861	7.84352	34.081	85.6989	74.3108	3.10858	3.9101	71.7141	94.8714	65.4584	84.4343	100.129	83.7162	1.47883	21.5218	85.3346	10.2748	64.186	19.238	88.628	85.118	51.5206	6.86635	-2.58065	6.05407	62.1563	54.6094
MAP4K2	-11.2098	7.56137	5.5578	14.135	-1.27282	76.7055	-0.215801	7.37149	-5.56761	93.7462	8.33932	-2.37662	2.35558	3.99125	84.8759	14.1853	6.65658	98.6177	-4.42832	22.6831	-1.99354	20.4285	94.4053	-0.698495	8.33055	30.9325	3.50078	43.9796	4.2321	2.67354	4.16966	6.10239	43.2301	-2.68404
MAPKAPK2	-20.5069	-5.66062	-15.763	-0.0200321	-12.5017	-13.8942	-27.9046	-14.2287	-6.81847	-16.8547	-13.9743	-40.1339	-16.1739	-10.9771	-13.9467	-18.7326	3.95349	-27.2293	-12.6463	-32.2917	-13.4303	-14.3179	-11.8616	-9.10845	-0.431841	-31.5406	-30.7692	-24.3452	-5.46999	-5.04808	-0.335383	-28.1651	-16.0085	-8.82395
MAPKAPK3	-11.1475	-0.428749	-13.1007	-3.9441	-10.6217	-0.902629	-11.0559	-9.6807	1.42164	-12.601	-11.3469	-24.8787	-13.463	-15.0648	-10.3166	-14.7979	-0.532387	-15.8235	-6.49893	-17.205	-15.8562	-9.89703	-7.28873	-9.11655	-12.3212	-14.553	-21.5839	-16.1238	-12.3008	-14.1615	-9.31734	-2.85714	11.9548	-12.219
MAPKAPK5	-1.87322	-2.37907	-2.14633	1.99513	-4.73016	3.40658	-7.23439	-2.67942	-1.05122	-3.19361	-2.64664	-4.46747	0.8593	-3.84677	0.650498	0.361388	2.93742	-0.922629	-2.4423	-5.95296	-3.00592	2.32091	-1.90484	0.814101	2.27721	0.469408	-3.48743	-3.7067	-1.77623	-3.19546	-2.21745	2.02758	11.5768	-3.598
MARK1	-3.49231	8.36923	-0.157729	-10.4611	0.904865	95.8615	-5.32196	8.55385	-5.06154	27.33	-14.8688	-2.0862	4.47451	2.71459	18.7697	4.15906	14.0584	27.2978	2.46154	-9.12046	-6.37509	10.5346	96.7692	19.4462	57.3388	3.08994	-12.5533	-0.570754	22.424	-16.3518	-17.0554	-7.1298	-8.69018	-5.93032
MARK2	-9.23816	5.66354	-0.359527	-11.8459	-5.82948	95.9897	-8.33205	4.03262	-6.57954	26.3773	2.85459	-0.432666	-2.13148	5.6754	8.73138	2.7735	16.0105	43.1314	2.66979	-9.00721	-19.175	10.8885	96.3695	25.7931	50.2044	5.30016	-15.3905	-2.21741	26.2356	-14.3164	-5.8876	-11.8306	-0.166945	-20.5871
MARK3	-2.57069	8.84319	11.4233	-6.03376	7.30557	99.1145	-0.935985	10.2371	-1.50814	41.2935	4.08982	10.0833	11.6623	8.16896	15.4181	16.2317	11.2635	51.7778	-5.88403	-7.58817	3.90789	25.5031	99.8686	9.09454	55.6455	11.9583	-8.07287	1.77778	45.2477	-6.15076	-3.2077	-9.87799	-0.226142	-1.28402
MARK4	-15.2406	-2.9275	0.413502	-5.63438	-3.82278	100.905	5.86058	-2.62596	-14.8637	51.4911	-27.3081	4.3068	4.70042	2.32068	15.0295	6.20253	15.677	52.5643	-14.2606	-2.87888	-6.42202	18.3544	101.282	-12.979	51.8858	17.212	-8.59552	-2.13057	25.2192	-10.8369	-14.6744	-0.472959	3.77734	-7.421
MELK	-0.540329	28.5203	0.220002	9.35052	-1.80164	49.196	-4.06874	4.49841	2.53239	5.46643	82.2146	14.6067	2.43192	4.47735	36.0982	6.57034	2.78293	74.8163	8.0789	-2.03437	-1.52308	4.18005	95.2086	2.21991	0.737744	2.98185	3.60121	30.0238	62.2442	-2.60298	-0.587947	0.808693	3.92157	-0.630652
MER	-3.37377	56.4602	-3.43704	16.9991	-2.19259	88.6952	13.2697	50.7833	1.18352	100.549	-0.876339	18.7285	-0.992593	0.281481	60.6667	6.48889	8.6747	100.36	0.56475	15.0564	6.14651	10.6074	85.3656	10.0133	7.17092	53.7112	79.0286	-11.165	87.6228	10.9454	-6.62123	11.6565	6.03792	6.14651
MET	3.91457	7.74263	-0.983231	16.064	0.850525	40.7894	93.0598	16.4044	7.23439	100	26.723	23.7258	1.6347	2.81699	23.7001	0.0904814	13.6925	89.571	11.5491	0.848401	-3.95295	4.66281	44.9743	12.1763	-2.4894	11.9525	5.27121	8.28946	22.8286	-0.806676	-2.40572	5.32684	3.66559	-2.35262
MINK	-1.13035	20.8811	-1.91513	4.44418	-4.54375	5.8723	-4.05099	1.46118	-2.67424	0	-0.771704	7.37169	0.316507	1.29285	1.63618	4.44719	14.7503	80.2743	-6.41266	-2.82378	-2.2355	-0.198487	88.0624	21.0906	-4.305	9.35391	-3.43143	3.54656	-5.33422	-4.50375	-1.80064	-4.34886	9.82198	-1.27269
MNK1	11.5888	17.5639	2.71705	72.057	1.80429	16.2384	-0.977597	-1.8959	14.3617	0	19.9802	91.1891	0.445765	4.33029	-0.997665	5.519	98.8119	70.2445	14.5158	-1.75153	-5.3669	5.98599	50.4096	99.4538	-4.63073	60.8176	-4.31772	8.51223	41.7241	-6.55804	-2.96736	-1.4053	23.2821	-4.39326
MNK2	12.3654	12.5164	8.2189	29.1688	-12.7328	65.8128	-4.07982	75.9386	8.3392	2.07029	69.4051	75.6322	7.09041	-3.41944	0.904147	8.74915	69.574	89.3073	19.7534	-1.8302	-8.50649	13.0048	79.9144	96.6029	-7.4026	47.6773	1.98271	4.79659	36.6558	-0.470259	-10.9348	8.41383	27.3953	-5
MRCKα	-7.46946	-0.84038	-1.95944	4.04868	-5.52998	17.554	0.534516	1.6129	-7.1876	-7.66284	-1.83746	4.58955	-3.43991	0.068425	-3.41503	-7.24683	1.39969	12.2637	-0.62115	0.93256	0.379855	-6.27644	14.0359	-4.5464	-3.2349	0.771144	1.81963	-1.14428	-2.64673	2.24042	-0.565371	0.363926	0.383142	-0.931258
MRCKβ	-15.9122	-5.13557	-7.24436	11.6255	1.58261	38.2123	-1.73004	-0.677849	0.0776096	-1.9656	-2.8463	7.98693	-6.77626	1.7275	-7.35581	1.99498	0.476644	47.3245	-7.54754	-0.836502	-2.20506	2.77515	18.1756	12.3399	-4.39996	2.43325	1.90114	-1.40813	-3.648	0.655894	-2.56167	2.06274	-5.11057	-1.22955
MSK1	-7.68271	0.0374158	-7.65938	2.3577	10.4674	23.2477	3.86213	-1.08506	-2.98079	-0.640615	0.0758725	1.133	-7.69362	11.0953	0.46801	-8.18446	6.75204	24.8522	-1.18483	2.26788	-0.0627904	-8.33286	87.6403	-0.561237	3.70463	9.79064	9.63287	14.0394	23.6594	3.08746	-0.531108	2.55978	0.256246	0.565114
MSK2	1.53326	1.21827	0.0557653	5.0365	-3.65048	9.67667	1.25	2.2003	-0.069483	-1.8011	-2.72152	5.71507	-1.38555	-3.90786	2.69818	-2.9813	2.04429	6.04426	-2.08912	-0.702555	-3.36077	-3.23868	77.0938	0.680934	-3.61259	4.45318	3.17518	3.09071	5.65617	-0.419708	-4.74684	1.24088	-1.01801	-3.97094
MSSK1	-4.85788	97.2249	-3.38405	0.0475737	-4.36896	5.29895	-3.23501	35.9042	1.4641	-1.70886	2.54925	0.445159	-2.72744	1.38898	12.021	-2.4749	-2.44216	21.6026	1.53761	-2.83064	-1.57997	33.1334	-8.93776	0.581965	-7.0491	-4.15482	-5.82778	-0.93978	2.44288	-5.31637	-4.86674	1.14177	-6.64557	-2.30919
MST1	3.91436	10.4414	4.97541	5.32334	-6.46231	70.7885	-2.0806	16.9496	-9.36616	83.4572	2.38298	2.73315	10.4884	0.834954	92.0165	15.8412	-2.92553	91.7082	4.14073	1.1059	-3.88483	27.9652	97.7457	1.51858	5.8958	24.5429	18.8754	3.01016	-2.3309	-2.38051	-3.74468	4.19869	51.3011	-3.08501
MST2	-3.46339	-1.42168	1.52045	0.434374	-1.64253	20.3106	-3.2989	2.76195	1.79746	12.5931	-0.793167	1.94377	4.10632	3.14078	35.1812	7.80201	-1.90381	14.0676	16.6531	-2.13665	0.181682	8.31252	97.6577	1.24632	7.19248	10.3997	5.55295	0.109818	0.470236	-2.13665	-2.8676	-1.17398	24.1315	1.56033
MST3	-2.52287	-2.36762	-4.62592	12.1484	1.88553	12.5035	0.295502	30.8345	4.6188	11.3751	0.532319	27.0648	0.418334	6.92979	7.47545	23.651	10.6719	4.84642	7.79041	6.71993	1.64829	-1.255	76.0244	5.70557	79.8603	4.81229	8.41633	-3.90216	6.08012	2.91124	1.74905	10.2878	-1.72786	0.0873267
MST4	-6.4218	-6.86937	-12.2132	6.79351	0.492424	-1.24544	-2.24126	4.07687	-0.47677	0.539568	-6.81955	12.1591	-3.25216	-4.45346	6.00108	3.4145	5.50576	4.67239	1.4595	-10.3397	1.66537	-8.2197	52.3766	1.60545	55.5902	6.7804	-1.47425	-0.173856	2.37631	-0.34864	-2.23295	3.1278	-4.61631	-1.00312
MUSK	-0.581145	6.02669	-7.79466	62.6236	-4.4639	81.5971	1.3308	45.4369	2.77658	98.9544	15.7895	21.6199	-4.44673	-1.71689	99.545	-1.61387	8.75706	98.8042	1.76496	24.0304	32.1835	46.5104	94.3823	8.30822	2.71878	33.0835	73.1179	10.7781	10.2464	7.20532	-0.928793	2.26236	-0.285171	-1.30841
NDR1	-6.3227	1.28861	0.244596	-1.28472	-1.86193	63.4928	-0.897412	14.7563	2.53209	-1.48148	-0.890648	-0.0725915	0.434283	1.12315	49.3935	1.0932	1.19565	67.6449	2.65243	1.39807	-2.75049	3.49923	30.9116	12.6504	-4.31238	12.5583	7.53826	0.881468	-1.17878	0.226715	-1.68234	-0.330625	-3.80952	-1.85658
NDR2	-6.40941	4.06772	-2.06931	-2.83525	-1.45245	61.8953	-5.50629	13.5554	2.53958	-4.75703	-2.05545	-1.57566	-0.151413	4.8284	51.0599	0.185061	-5.66038	65.6527	3.47405	-3.18555	-4.32821	2.18147	22.1966	10.1913	-1.8258	7.68137	0.229885	2.69176	-4.53227	-3.24028	-1.48184	-0.503558	-2.50639	0.504779
NEK1	-7.45903	5.0292	-0.542299	56.4887	-1.21114	7.7039	-7.9457	-1.6764	4.29459	2.24159	24.4019	0.761509	-3.74187	2.83803	-3.77802	15.094	7.06767	5.59017	3.72952	-4.81448	-2.71507	0.741142	12.9026	2.42984	10.4183	-1.38456	-4.77828	-1.29803	-0.568272	-5.10407	-4.85304	1.77376	-2.73973	-4.05683
NEK2	-6.34992	3.36806	7.39877	8.86443	0.116647	5.70325	2.36095	2.02084	6.61936	-2.68714	16.1654	-2.4134	8.76521	2.76621	11.1481	11.9147	3.14815	37.6396	6.63733	26.5353	-0.366651	9.88169	0.206574	8.16418	-1.99267	-0.918039	7.40151	-0.179822	2.04049	8.60371	2.75689	2.79548	-1.02367	-0.589829
NEK4	-4.76152	-1.16393	-2.91392	12.2213	-1.66827	25.4515	1.99826	-3.4755	5.13593	4.5738	4.15309	-2.14606	-2.33558	4.44131	1.25306	-0.645066	-6.48508	50.2402	4.64757	12.5543	0.694634	-0.57092	25.5657	6.17776	6.33342	2.69058	2.56299	19.4747	0.858077	3.44628	2.03583	2.38923	-0.4158	0.953419
NEK6	-5.53594	1.42689	0.342704	-1.12844	-2.64726	0.534471	-4.02752	0.593312	1.80936	-2.72008	-3.01205	-4.69842	-0.978444	-2.35919	-1.86252	-0.213569	2.37389	-2.01054	0.769834	-2.62385	0.246216	-0.382438	-8.25243	0.318721	-2.59894	-0.795613	-0.0458716	-4.08558	0.410359	-1.50459	-0.324374	0.486239	-1.43422	-1.03046
NEK7	-10.6827	-1.33454	0.398675	-10.679	2.07924	1.23138	-9.17601	-0.251434	1.68268	-5.29753	2.28385	-4.36984	-0.791217	4.85157	-1.80937	-1.31869	-9.22619	-2.05169	0.689833	-3.65194	0.263089	1.44136	-10.7601	0.702727	2.90713	-2.51799	-2.96638	-7.07434	1.01289	-0.843771	1.63132	-5.5768	-3.55588	1.9337
NEK9	-3.18156	0.367647	2.79631	29.6586	-6.58623	69.5136	-1.1052	8.96493	-2.319	57.1204	101.233	-1.05294	1.70334	-4.25834	17.1327	2.12917	3.17003	21.0731	-3.28054	9.62507	-4.43469	5.77715	48.4304	8.97907	-1.57409	1.32699	16.0045	-2.78379	-0.80218	0.727476	-3.0137	-2.04253	-2.20299	-1.98275
NIM1K	-7.33115	-2.12694	-1.81347	0.42655	-2.22586	3.15647	-1.92468	-1.36893	-3.66557			1.09669	-3.41017	-12.2713	-1.49625	0.713757		28.7936	-2.33058	-2.70495	-1.85127	1.31649	1.15398	-10.103	-1.50415	-1.06312	0.842697	0.0559534	-1.93542	-0.384935		1.48772		-1.66193
NuaK1	-3.50834	-18.9994	9.19761	84.6847	-4.32231	90.2779	-1.52944	16.6028	2.32242	99.1271	6.97464	10.8423	0.440131	-0.236994	101.783	10.0102	12.8174	98.1855	6.69549	8.06621	13.0888	25.6066	101.421	48.1779	-2.1489	7.8629	91.0957	4.32348	9.68092	5.78253	-0.634058	9.44898	4.07371	-7.18472
NuaK2	3.1129	-1.05749	6.03727	68.2829	0.626034	97.6914	-1.04431	43.3572	-9.99404	86.9328	4.52708	1.98953	3.48996	3.34605	94.7327	8.32554	8.88594	73.3583	6.37474	8.83187	0.38503	30.1432	99.2106	3.8874	1.46311	5.25056	74.504	1.36126	3.95811	5.84813	9.21584	6.60898	4.35572	0.523641
p38α	-0.751742	-0.470603	2.59371	0.842572	-7.83801	-0.837306	3.37029	1.80296	-5.49444	-2.26674	-0.741133	38.8317	4.80064	34.9468	6.8028	7.22371	31.6351	4.14292	-2.70749	4.44568	-1.34461	5.9041	-1.37514	-6.17895	13.5276	0.931609	2.92683	88.1192	-0.132423	3.33703	-3.91742	1.52993	9.75224	-1.11032
p38β	-3.08376	0.143734	0.972146	-2.40872	0.0465188	3.38429	-2.57353	2.35202	3.8155	0.299222	5.29891	8.43882	0.677226	55.7916	7.47133	10.5298	1.70828	6.05787	9.05527	-1.57201	-0.0711997	1.14691	1.18908	4.5603	5.89771	0.843882	-3.42292	87.6884	-1.85119	-1.71146	2.30978	-3.42292	23.7582	4.54492
p38γ	-1.73652	1.72539	-6.031	-0.86671	1.97494	3.15022	-1.26067	3.31719	2.10386	-4.18744	0.310752	0.231481	-3.98174	3.19601	-3.02612	-4.58696	2.64901	-0.507055	3.50643	-2.90217	2.29794	-4.48078	7.1353	2.19291	1.73336	2.46914	-1.77282	0.892857	0.277338	-1.74655	0.683654	-1.74655	-0.299103	3.8233
p38δ	-1.73903	0.127529	-4.21315	0.654392	3.48749	0.869515	-3.92635	3.13025	-5.79677	-3.41486	-3.42548	0.0743149	-2.92429	5.10127	-3.04343	-3.43334	3.03514	1.73711	-3.67515	-4.19255	-6.71481	-3.51998	3.36212	-5.3794	-6.29446	1.15188	0.055457	-0.185787	-6.32679	-3.98181	-2.70433	-0.055457	8.39871	-6.43458
p70S6K	-13.7266	2.72538	9.12427	20.456	4.72044	32.7378	5.67876	16.4188	19.1275	40.2726	10.51	33.0049	6.1596	13.5281	24.6528	11.5996	11.6129	79.4263	19.2771	5.32642	-1.57993	8.14564	82.0607	20.5899	-0.418216	30.6868	28.7668	63.6048	41.7054	8.20725	-1.39104	15.4611	9.29368	-3.20632
p70S6Kβ	-14.1685	8.57569	4.37467	6.11491	1.08623	97.5889	11.8603	70.0472	5.59284	5.86854	-0.55371	-0.889012	2.47005	8.18391	0.699353	9.49334	8.73162	23.3088	0.869998	5.43137	4.21587	11.0557	69.3512	19.7862	-0.851414	7.19544	5.54221	2.19475	6.63279	8.23942	-0.996678	3.56549	0.234742	-0.466905
PAK1	-0.369138	-14.4932	-3.28724	0.844832	4.77282	4.26626	4.66066	7.58245	3.21331	-4.02951	-0.270453	0.380073	-0.679573	12.2481	-10.4781	-6.29	10.4775	4.01792	6.56581	5.12532	-3.5585	-2.11774	21.053	-43.7579	-3.61882	2.03611	8.68769	0.719424	-5.3076	6.74458	-1.35227	-1.11236	-4.93757	-2.56333
PAK2	-5.1962	-28.5256	-7.18656	-4.4182	11.708	15.9929	-1.68416	-4.22117	-17.4435	4.92228	-9.7931	2.49878	-0.985171	9.48875	-10.3598	4.1792	3.55781	10.2511	-5.81451	1.66229	-9.79393	11.0235	35.327	-13.7337	5.85784	-2.40127	15.5074	4.69283	5.18639	-3.69641	-8.68966	-1.88101	12.9534	9.81709
PAK4	-1.64871	6.54887	0.0966059	7.85441	-2.71141	45.356	0.973819	13.17	2.09538	-5.56242	10.62	-3.66238	0.276937	-2.13177	7.77356	-1.9772	-5.8642	74.4603	10.6477	5.79502	-4.61156	1.83551	30.1826	11.9614	-1.8801	11.2539	65.5172	0.339559	7.7155	4.5977	-0.675261	4.94891	-7.04574	-11.3515
PAK5	-0.369942	7.86127	-2.57866	4.50501	4.81965	82.1272	0.764739	14.8131	0.678227	6.89103	21.267	4.2875	-0.982348	0.399079	24.6969	5.7713	2.82885	91.8304	12.4239	2.48888	-0.213045	10.5756	37.3642	5.99615	2.26155	7.31213	68.7848	1.90209	8.84956	0.472747	-2.62443	3.5317	-1.22863	0.606359
PAK6	-8.73973	-7.9489	9.65187	9.09345	4.75297	26.4017	-33.7297	17.9864	1.90611	3.14961	8.74126	6.65407	3.68981	13.4251	14.8635	13.2791	2.886	21.6415	8.59779	10.0448	12.8941	14.4674	52.0937	6.77279	12.4235	0.27288	42.0677	1.15449	13.5765	12.1992	8.04196	6.33744	-6.99913	11.1882
PASK	-5.37376	-2.59513	-1.93804	12.8012	-2.44731	-5.18153	-4.97284	1.27572	1.06601	1.03481	1.12465	5.35047	-0.60829	-2.99901	1.18829	2.39072	-4.94845	2.54073	-0.0436891	-1.4626	0.744725	0.792191	6.16016	2.57766	-5.13033	6.12763	-2.38195	-1.00135	-2.28934	-2.08943	-0.187441	0.181084	2.35183	-2.55137
PBK	-15.2854	-2.63044	-1.23958	-2.88242	0.203095	1.08821	-3.89555	-10.774	76.1387	-14.3379	12.3907	-3.27894	-1.84187	7.76665	-5.42755	-7.4445	3.96476	-2.54002	-9.30383	-1.71233	-5.44122	1.39366	-7.30037	76.7152	-5.56809	-1.67796	-1.85502	-3.84852	-7.0764	-2.88242	-3.79009	1.2129	-11.7808	-3.947
PDGFRα	1.37953	42.7496	0.404758	97.5639	2.05683	95.5165	18.2008	60.7776	11.1773	48.6331	62.7178	68.9627	1.95771	4.20453	29.0187	101.28	54.0054	95.1825	94.2781	58.6045	2.45333	1.74294	99.2005	68.6314	68.6622	83.4153	99.4084	88.1304	96.0346	24.8999	4.52962	30.2071	86.6187	11.3254
PDGFRβ	5.35797	25.5134	0.03621	95.4201	-2.23295	94.0707	19.7716	55.1495	1.99187	17.6136	32.3024	68.4234	2.07604	1.37598	51.1889	98.7568	56.8475	105.27	54.8098	58.6198	-0.157195	2.31744	99.5985	86.5871	72.9021	64.1527	99.1808	106.179	93.9782	20.0323	3.43643	30.7062	33.4091	3.38573
PDHK2	0.164427	0.393194	0.0902026	0.650786	-1.131	2.02316	-2.61542	-1.40835	-0.378896	-3.51262	0.108342	2.44128	3.57341	-2.01915	4.23952	0.88121	-2.06044	4.77699	-1.0795	-3.37672	4.8524	1.88038	-1.17958	-1.95167	3.53478	3.85326	1.10511	0.884138	-0.608134	2.46807	-0.541712	-2.00147	3.73216	5.00443
PDHK4	0.391369	1.70298	0.0757002	5.60729	-0.428968	4.93971	0.789474	2.54919	-1.1318	-3.76344	-1.03093	3.078	2.98595	-2.1112	3.42333	0.395323	-2.83447	2.95558	-1.08949	-1.45749	1.99458	-0.66448	1.08949	0.264438	-3.81487	4.63449	11.8421	3.89997	-2.71108	0.425101	-1.64948	7.57085	-1.39785	0.135554
PDK1	-1.47232	-2.12266	-0.422434	6.56839	0.386482	4.30855	4.04926	-2.24912	-1.65297	-5.17473	-5.38244	-6.70261	2.41776	-2.1661	0.206723	0.512313	0.796178	-1.86882	-2.01427	1.36219	2.14844	0.602193	98.2838	0.0270978	0.292969	-4.67206	8.69565	-7.20575	7.36328	2.1086	-5.52408	3.15357	-4.09946	0.546875
PEK	8.38781	9.08332	10.0666	1.5074	4.66503	18.1249	4.25303	9.50063	4.91028	1.10269	99.4226	2.82332	5.64714	8.97931	0.561207	5.19116	0.579151	8.46995	7.46975	48.6945	4.19977	-1.64854	10.6969	7.35846	17.3099	-9.53248	2.2611	8.65209	2.15664	-0.188425	1.13425	1.58816	11.3485	2.07151
PGK	-3.70305	-1.52685	-3.0678	-2.57501	-3.10169	60.0971	-4.50035	37.9373	2.54475	-2.59901	-1.3083	4.01169	1.63277	-1.28249	26.9435	-0.186441	4.92197	41.2631	1.88955	-2.09072	-2.33341	0.683616	97.5137	3.60945	-1.82261	13.6757	13.1585	-0.449489	0.301834	-1.98441	-1.3083	0.259863	-4.33168	-2.63524
PHKG1	-4.15582	77.5087	-1.21852	-0.380777	1.77338	96.4814	-2.38971	91.0068	3.09193	2.73973	-0.590319	25.0628	-1.79514	3.02453	53.5277	-1.30555	44.1509	91.9683	1.52934	0.354517	1.80769	64.7011	97.0134	37.8789	6.23979	21.0659	1.66754	1.75968	8.17816	-0.945378	-2.24321	-3.62395	-0.913242	2.38484
PHKG2	0.00604595	75.4837	1.63677	5.40009	-3.26233	95.9311	0.265957	83.3676	2.21886	10.4675	1.97917	11.1949	0.784753	-1.79372	40.8408	1.78251	8.07537	58.5984	0.816203	1.642	5.62725	92.4103	67.0919	11.3724	7.72003	4.25276	2.24329	1.49776	6.49924	3.29556	2.8125	-0.185014	-4.36992	4.22044
PIM1	-4.2763	15.1508	3.99678	24.2564	-15.5186	2.98116	-8.96902	-7.81168	0.974272	-7.23789	3.59598	31.6543	-0.907693	9.80895	-5.88537	5.59256	16.5331	5.89119	-4.11295	-2.32701	-5.32472	8.12532	51.9398	-4.40464	-7.23299	-3.77194	-1.52566	-5.00554	-5.67867	-6.0564	4.44209	-3.59069	-3.40607	-10.5417
PIM2	-16.503	2.36252	-6.40476	-2.22103	-6.40476	-10.5649	-4.64722	-8.39302	-4.45356	-5.28343	0.23753	-3.02005	-6.48521	-1.4347	-7.55788	-5.47511	10.8142	-1.37117	-5.08896	-7.10909	-6.57308	-3.35657	-9.24792	-5.44709	-6.14541	-2.72498	-4.08527	-2.90723	-6.20119	-3.45197	-3.84798	-3.71956	-1.98129	-6.88918
PIM3	-0.0375689	52.3585	-13.0709	9.44291	5.16253	5.6896	1.77606	-0.463349	-0.81366	-4.0201	8.91266	23.4025	-7.03466	9.70103	-9.56487	-3.9031	10	23.3305	-0.24066	0.253723	-5.31234	-6.29716	71.4435	15.2303	-8.12595	4.6757	-0.165472	1.11497	-2.65109	-0.0220629	8.43731	-1.30171	-4.92462	-7.84154
PKACα	-5.13616	4.92533	-13.3411	-20.0407	-12.1958	16.6266	-28.0448	-7.6896	-9.63397	-6.27514	-1.90141	-11.4041	-7.56016	-9.95978	-7.35565	-13.6819	5.52283	6.88144	-10.7818	-27.6782	-20.4642	-8.11916	92.8433	-11.3089	-9.45841	-6.97885	16.3544	-15.5093	-5.00967	-28.4318	8.52113	-19.9389	-4.02253	-12.5532
PKACβ	-13.0864	1.94636	-19.5799	-18.6693	-0.560093	9.20262	-8.67508	-11.3553	-6.51179	-2.30292	-1.44928	6.24094	-15.9043	9.50992	-20.5484	-23.3139	-2.59542	21.5897	-9.04117	-16.5185	-13.6032	-17.713	91.4611	-6.26065	-6.68879	4.02608	20.4187	-3.65349	-4.64499	-20.8489	-5.09745	-14.7118	2.65722	-8.41407
PKACγ	1.68229	3.02287	-7.37778	4.42647	-3.15495	8.98975	-1.42621	1.46324	4.37221	-6.51899	1.15808	11.7885	-3.89394	-2.3185	-4.57609	-6.74436		5.40518	4.89792	-0.043482	-3.88511	-5.98912	81.2757	7.39508	-3.56207	2.98507	9.87912	2.68994	-2.6279	-3.88729	1.96873	-0.547874	-2.97468	-4.61847
PKCα	-16.8872	1.47597	1.21326	4.85306	-0.115973	14.7995	-3.51312	-9.16162	1.54245	-8.46818	-7.2549	-4.52612	0.321156	4.82626	19.8849	1.24002	2.04082	61.8165	0.744631	-4.08738	-2.87306	12.2039	92.3875	11.4753	-1.6222	-8.08019	2.8713	-1.85298	3.23463	0.20268	-5.19608	5.25842	-3.61381	-2.62875
PKCβ1	-10.9742	-1.89378	6.80075	1.73819	-3.39409	7.4173	1.195	6.66464	-4.34598	-2.90323	-5.74495	3.73986	5.00314	-0.980515	12.3444	3.45695	4.58716	18.7934	-2.90137	5.21456	-2.11012	7.19045	89.0683	9.09256	0.544016	4.22204	2.58012	1.05845	-0.445104	2.44432	-3.47222	0.869093	-3.80645	0.362677
PKCβ2	-12.0433	0.0492368	2.31954	-0.277604	-1.88347	31.1866	-1.988	4.18513	-2.01871	-1.59858	-3.08077	5.44	1.6144	2.15253	14.2141	2.10614	3.7415	31.1579	1.78237	1.49548	-2.01798	4.1195	94.4658	17.3018	-1.56856	3.46947	-1.78204	-0.488421	-1.05746	-1.97905	-1.58201	-1.50443	-3.01954	-1.65668
PKCγ	-7.43396	0.135345	-1.86232	-2.11414	0.893154	10.9028	0.161168	-1.45872	-1.51887	-0.662252	-0.38059	4.18288	-4.38026	4.10471	1.00717	-3.64863	0.809717	19.4729	0.797032	0.113766	-1.62199	-3.74365	90.9068	13.5496	-0.947584	4.6781	1.41259	0.0972763	-0.42684	-0.132727	0.38059	-1.73493	-4.39494	-2.23664
PKCδ	-8.63529	1.82865	-7.56212	5.15366	-8.79476	34.1856	-9.62016	5.01185	-2.11649	-1.13809	-5.87762	9.20493	1.67286	-2.67071	8.28605	-11.5731	1.50502	12.3512	0.52489	-3.14946	-4.81696	4.8425	92.6177	15.8314	0.470991	6.48384	-2.9204	54.4005	-2.03383	-4.35198	-4.7504	2.67227	-5.08346	-6.31556
PKCε	-8.61816	10.423	15.0915	-2.53737	10.7119	38.6238	-18.5434	10.5584	4.21884	-7.1663	4.85437	7.64196	13.4237	-6.95593	26.7254	11.5661	3.22967	27.2132	7.62549	4.677	8.41584	9.78983	84.3993	-11.6864	4.78994	1.26002	0.425182	5.94011	7.29195	0.617199	6.31068	-0.0548622	-7.71335	7.89403
PKCζ	-5.4446	10.3804	14.2817	-0.226425	9.93754	4.83399	0.75919	13.7133	9.05737	8.95765	4.88506	24.4562	16.0988	19.0233	17.4333	17.6604	-2.53623	20.9799	10.2786	3.18327	0.558051	17.0074	-3.40695	9.51533	-0.081666	13.336	-0.213106	15.43	-0.966381	1.02557	4.31034	-1.10549	12.8664	0.367497
PKCη	-3.18357	10.1605	1.42254	-5.11518	5.86454	17.263	-8.52529	5.29997	-2.05363	-8.29545	9.4518	11.3762	0.743392	12.8763	18.8051	3.51505	5.45775	12.7155	3.27325	2.08898	1.58109	0.816814	84.127	0.116581	5.10589	0.769704	-3.20687	0.0769704	4.42414	-3.20687	-7.65595	-5.44264	-21.9318	4.22106
PKCθ	-8.13207	-1.9918	-0.212346	2.59988	-2.26667	28.7987	-5.31242	-0.708493	-4.34453	-2.87173	-0.775695	1.5748	1.09136	1.98025	9.65432	-0.0246914	5.66038	11.8012	-1.12735	-3.08519	-2.77342	3.07654	75.6127	10.4492	-2.15602	3.26772	-0.597972	-2.99213	-2.29322	-0.320652	0.387847	0.762631	-3.12699	-3.08702
PKCι	-8.38381	10.9765	20.9211	0.376254	14.5263	-37.9974	-10.0125	25.3211	2.4473	-5.18293	14.1714	31.452	17.6316	-1.17516	33.5526	21.2632	9.23077	27.7778	2.22922	-10.0753	-5.90858	19.3158	3.0773	20.1842	-3.94649	22.6206	-7.50418	21.0491	-0.802676	-6.50084	8.68571	-2.23662	-15.7012	-7.7592
PKD1	-9.47504	2.03893	-2.08802	6.40394	-1.69202	74.0751	-5.0332	26.8752	-5.04659	44.3662	82.8292	9.49432	-3.47403	0.180002	1.45801	5.49005	39.0625	51.634	3.21985	10.9231	0.14827	-0.468005	53.4643	22.2253	9.90115	-2.56278	0.29985	14.7403	3.64086	-0.5997	9.1637	27.9717	43.4859	5.15651
PKD2	-9.87991	-1.05432	-19.8111	-0.865407	-6.83093	85.7073	-7.46982	25.3945	-10.8155	43.2669	82.4688	9.98714	-11.5742	2.48527	-24.3982	-11.6168	31.694	56.1616	-3.20486	-4.21316	-6.06708	-10.5375	64.3416	15.6891	4.44349	-4.95498	-8.65407	12.9714	1.11087	-14.6891	-3.28299	44.2041	-12.6693	2.3072
PKD3	-2.07033	2.16515	-2.45745	7.69692	0.730594	85.0257	-3.33932	45.8949	4.40932	56.1269	93.0693	8.3768	-3.52013	5.01453	2.95558	4.03487	27.1941	52.5928	5.484	11.2159	8.23423	1.46119	68.6527	28.1786	14.1502	-12.3658	2.93501	15.4035	11.546	0.359389	2.47525	38.6643	-4.7046	13.0814
PKN1	11.2873	12.9782	8.1714	18.6885	5.87942	76.6434	16.2295	25.0264	18.7698	22.7058	-2.84288	16.185	10.7623	6.07872	63.7768	-1.39512	5.52764	65.3902	8.5817	12.8689	6.91983	4.68361	94.0605	13.8237	9.53586	-4.55202	27.459	9.75434	8.86076	9.67213	3.71094	18.1148	-0.37843	-11.1392
PKR	7.19237	5.32929	-0.986141	8.90891	-11.4872	14.2114	7.00701	-0.996534	0.866551	6.04516	99.8093	3.25459	2.63859	9.51493	3.49147	94.323	8.42912	70.9449	5.63258	76.4431	-2.17327	0.666311	32.149	5.80589	84.7577	-10.3937	8.30831	-6.16798	0.939794	1.46813	1.12691	3.37004	-0.764749	-1.40969
PLK1	-2.56965	-1.75636	0.028609	-1.53315	0.406248	48.9964	-5.07219	52.8552	-1.0815	-3.125	-8.61094	3.77824	0.783887	-2.55765	0.211707	-0.818218	-6.65025	7.51945	-2.27548	0.613262	-1.16646	2.12279	6.27271	-0.475861	-1.51883	6.33412	-2.46582	3.88937	-0.437424	-3.97343	-9.11376	-3.69235	-3.83255	-0.741191
PLK2	2.47295	5.87326	10.4278	7.26512	-4.76697	0.274772	6.7326	-3.5377	-0.309119	1.10007	-4.64348	4.91368	12.7687	-2.68142	13.6625	8.6827	-0.44843	4.71448	1.71733	3.65158	2.14027	10.0447	2.67903	1.06474	0.757326	7.10491	6.54241	5.9429	4.1159	2.77672	-1.65217	7.0369	-1.84528	0.329272
PLK3	1.7579	-3.93858	1.89089	5.69248	-0.0416089	-2.56787	0.708833	-0.155763	4.1344	-2.24172	1.84534	3.60202	4.56311	0.929265	4.71105	2.5289	9.42957	2.59345	1.52648	-0.239913	-0.714404	2.14979	-0.226969	5.19359	-1.1879	12.2228	-0.119956	3.9302	-1.64479	0.774264	-6.59051	1.59215	-2.82651	-4.38611
PRKX	-4.58545	1.81049	-4.49265	36.5025	2.56723	46.6667	-5.6531	11.2352	2.16582	-7.07506	-1.55109	0.676724	0.385084	1.82273	2.19498	-2.04095	2.5641	3.89116	0.659898	-3.52605	0.637384	3.37591	97.3435	1.37056	-1.74588	15.2263	-0.556745	0.70492	54.9397	-4.52534	-1.18613	-1.54176	-3.45125	-0.956076
PYK2	-3.54548	46.9922	-3.92848	0.979325	2.41292	104.141	-2.254	99.5931	2.49927	94.8972	56.4901	1.39855	-3.37011	4.14119	95.6328	-1.93433	1.34983	92.6066	3.37111	13.2753	5.33743	100.831	72.1302	62.322	7.85245	2.87441	63.7028	19.3056	12.114	-0.621794	2.71523	1.47676	0.921332	5.36538
QIK	-0.215414	3.0876	2.47755	44.1821	-3.96274	100.231	-2.24283	7.41184	2.36955	38.449	80.1865	68.4603	2.15351	-0.749342	6.50105	29.0623	64.1667	62.8612	4.69922	26.0034	-6.33384	2.53156	101.843	32.6073	6.50365	11.4935	-2.54637	7.28137	-2.53014	-3.84486	-4.662	-2.5801	5.79592	-4.19426
RET	13.7222	91.0901	1.62361	95.9813	-6.11323	95.7876	10.9313	31.6058	4.09752	44.3962	49.1489	39.8857	7.82154	-10.2217	99.4776	100.071	47.6673	99.8714	87.6564	63.7635	1.71	9.65693	93.809	7.27598	55.1369	87.7571	98.7793	93.6571	102.294	37.8686	-8.01418	35.1255	32.2328	16.3492
ROCK1	-7.78039	-1.97886	-0.414962	2.0047	-7.07807	25.3494	1.06422	30.8691	-2.61304	3.39367	1.24777	-2.67805	-4.36303	0.403106	4.50531	-5.33523	1.18906	59.8877	-5.41985	0.395991	-5.35837	3.63981	12.6072	-4.98532	-2.59904	9.30885	3.42779	-2.1401	3.515	-1.14577	3.20856	-0.767232	1.28205	-1.56858
ROCK2	-2.29075	4.54007	0.528497	10.7527	-4.1439	30.1586	-0.287572	28.3829	3.54564	4.24779	13.5647	-4.34899	-0.180169	1.32124	7.35091	-1.92181	3.21593	65.9712	3.73505	-0.775194	-3.32735	3.27908	38.2325	6.54078	-4.81149	0.2332	1.28782	-1.20282	-0.275284	2.82571	2.99685	-1.33783	-0.176991	-3.24357
RON	7.67927	9.76716	6.95923	48.0302	-3.72375	17.5721	13.3158	8.70682	-9.42829	101.105	37.1287	5.03208	7.71222	-1.41773	33.2549	7.59456	3.17797	98.4864	6.97967	0.706502	2.81609	11.3242	22.1852	5.68977	4.48276	22.8348	2.59849	1.39334	49.3218	-1.28128	-6.43564	2.22728	-2.02578	5.03448
ROS	1.79052	13.5319	-5.79347	66.9858	15.9482	101.173	20.9603	101.157	2.96308	101.689	8.54962	21.5284	-3.53051	13.8141	101.038	-3.54483	16.3701	99.6151	4.81699	29.2718	85.6023	101.167	101.727	100.967	3.74037	37.0259	94.2994	3.79242	63.8614	15.1871	-0.610687	21.1488	1.95946	1.89769
RSK1	3.57271	15.1058	-0.526577	-7.28605	-5.5539	97.8061	1.52081	74.9039	1.3891	-4.96278	7.98548	4.37123	-0.755092	-2.03676	18.917	1.2916	12.947	53.7683	5.46927	-2.98631	-3.4583	2.31495	97.9087	41.5962	-1.79431	7.42894	25.8537	7.96727	50.6014	-7.99115	-9.80036	-4.6592	-1.32341	-2.78669
RSK2	0.0539811	14.359	-1.77831	2.5681	0.102595	97.103	-3.10924	83.2389	6.04588	0.217486	-0.44953	7.82867	-3.61647	3.77891	21.8099	2.45373	8.04498	48.3038	7.41341	-7.07145	-7.40195	-0.880605	99.0733	42.0963	-5.12797	14.2446	22.7002	3.31144	46.6212	-1.52252	-1.75725	-3.01752	-2.30535	-5.92893
RSK3	1.1298	12.8072	-1.47172	10.2686	-4.98237	99.7279	5.11848	90.2441	8.35395	3.33807	3.06905	27.4464	-0.459911	-3.35735	46.7423	8.20175	29.5094	64.2712	8.79927	-0.616114	-9.71449	2.52951	97.7651	53.1008	-7.50584	41.741	63.6019	12.3689	55.6294	4.40758	-4.77408	2.8436	-0.497159	-7.11079
RSK4	4.21332	19.162	-4.15919	7.59698	-0.233393	97.5759	7.71821	82.6273	5.51772	-1.58025	2.20008	15.897	-5.26032	4.5781	19.1682	5.00898	22.7673	43.7848	5.51772	6.78879	-7.03996	-1.94494	99.1689	38.0122	-7.08073	24.0849	37.5	0.400983	42.9193	5.4014	0.207555	0.228987	-3.06173	-6.04784
SGK	-5.11103	11.7613	-5.63787	0.775108	4.92712	4.75855	-0.730816	1.96217	-18.811	1.46431	3.85448	-6.17445	-3.46946	6.89074	-5.64992	-1.15649	1.89055	8.51574	-21.3723	-1.45056	-1.15635	-0.180701	31.1949	-10.7038	4.95061	11.0748	6.72129	-4.97659	11.2503	1.82704	0.216544	0.29897	-0.122026	-0.674536
SGK2	-19.4189	-5.24909	-1.92125	-4.22078	-0.294245	-7.61964	-5.53657	-5.58774	7.2097	-2.30769	-7.57932	-9.14489	-2.26742	3.49632	-3.18477	2.37127	6.52174	-3.51205	6.0868	-8.37321	-3.81813	4.34444	-0.775332	25.7998	8.33783	8.3814	10.7656	-4.98812	10.3211	-5.16063	-6.99177	-4.1866	2.66272	-2.33405
SGK3	-11.8482	1.51085	1.46988	-1.95028	-0.739744	-2.26059	-2.48607	-0.738385	-3.85096	-2.92772	0.0853971	-20.3762	1.25853	4.89	0.413104	7.11884	2.35018	-17.8398	0.579348	-2.9147	-4.61376	7.56076	16.0059	3.60105	-6.81481	-0.803213	-0.535791	-9.42718	-0.719577	-3.96485	0.768574	-3.98628	-2.37877	-3.7037
SIK	0.255844	12.1875	-9.58023	37.1228	0.277323	98.7324	-6.33374	15.2692	0.383766	25.5056	99.5851	40.3389	-1.90344	2.23119	7.48771	30.7702	52.0858	58.7253	8.12885	29.6657	-1.699	-1.86562	99.2441	22.3282	22.301	9.05412	1.6917	65.6171	8.6689	-3.15334	-2.96384	0.717282	24.2697	-1.99331
skMLCK	-17.4752	-10.7332	-3.80192	1.2892	-5.39873	-6.23187	-2.07317	-8.69261	-9.87296	1.56986	0.519673	10.1917	-6.95751	-4.50528	1.33067	0.45623	21.1443	4.78494	-16.735	-2.99652	-5.83689	-0.45623	0.930279	-4.11123	30.364	11.5046	5.19164	69.0793	-0.264389	0.627178	-3.34076	-1.49826	53.2182	-2.7049
SLK	1.60698	12.4611	7.83442	36.3697	3.27058	95.3236	7.55114	64.107	5.76624	99.5464	11.5976	77.8249	7.44495	6.17666	63.0099	6.93564	72.739	99.1619	12.1052	16.2684	5.57589	90.0834	85.3703	17.2765	0.681025	10.6331	17.1764	18.3177	14.0461	7.94303	-2.60355	11.1929	42.7923	2.35805
SPHK1	-3.14978	-10.195	-5.44268	-1.71684	-25.529	-3.84401	-5.27494	-13.3148	-5.62674	-13.7793	-18.3031	-14.8557	-3.25297	-5.65323	-4.17939	-8.17981	-15.1468	-6.00165	-3.38119	-13.5606	-15.6033	-7.0639	-2.46411	8.72081	-13.0837	-5.14427	0.199054	-19.324	-13.4998	-8.38517	-11.3661	-6.36974	-11.2831	-15.3259
SPHK2	6.90259	1.74025	6.50082	0.914177	-7.55402	11.224	-2.06031	6.39648	10.788	7.87615	-13.872	7.5395	10.6228	-11.9121	20.2833	7.2998	-4.56919	8.57188	9.65896	1.97844	-1.55602	9.95097	11.5978	14.6967	-5.30775	6.85124	-2.48329	-10.0422	-3.75173	-3.86137	-13.9654	0.3684	7.76752	-6.639
SRC	10.4573	10.3311	3.2862	65.561	-0.524688	65.2412	-1.77003	8.94355	6.44592	60.549	68.4297	43.9871	-1.73975	-2.15951	95.3109	67.1766	35.2214	89.099	91.088	37.1289	-4.39385	27.6096	78.9656	8.66604	2.67077	0.370782	94.2439	70.8194	48.1846	-2.82927	-5.39804	-1.93728	51.507	25.7477
SRM	39.4936	40.7301	1.0219	0.441276	-1.10949	92.0586	-0.916497	40.4652	1.36896	1.51286	99.5928	1.79252	3.94161	85.3431	71.6934	10.0584	2.56024	23.3592	102.201	-2.74949	-3.20476	58.6277	7.06558	32.0453	-3.43677	0.409315	13.0686	31.5596	-1.55162	-1.40869	-4.15309	2.76646	101.815	57.7871
SRPK1	-4.72788	82.7695	5.80093	-12.2149	-3.37481	4.01345	-6.10746	72.5573	-10.7796	4.55102	-5.90268	-9.49815	3.90358	-5.20995	2.16174	2.5661	-3	-8.35298	1.19773	-0.850406	-11.8954	5.64541	1.28178	-9.0145	-11.9935	-20.4783	-4.0201	-12.7989	-8.59477	6.30073	-0.0691181	-3.01508	2.0553	-5.78431
SRPK2	0.685679	93.3874	-1.60656	-0.951173	-1.40169	9.81767	-8.93046	79.6426	3.12711	-2.32868	11.2903	0.862736	-0.86258	1.97315	20.7019	-1.85455	3.46369	11.7022	3.01283	-5.50624	-3.00819	4.00022	24.7572	3.77123	-6.115	-1.19456	-2.71613	-2.82048	-0.197258	-2.61044	-0.868486	-0.581272	-2.19561	-2.34737
SYK	-19.358	-8.99805	-23.2131	44.3145	-19.3156	67.7529	2.10537	5.107	-23.4436	62.9712	36.8785	-8.13409	-2.3517	-19.5006	-5.2715	-28.8149	5.04673	70.0391	-19.8261	-16.9243	-8.15776	15.6692	96.7169	-37.5243	-4.25586	-6.24544	84.5606	-8.05683	7.50042	-12.1949	-4.97238	-0.549227	-3.7694	-6.37114
TAOK2	5.31403	5.52355	-1.44308	6.27374	0.465357	15.7802	3.14446	7.19966	5.41879	33.2718	33.5829	0.959969	-0.0517063	-0.719188	3.09768	-1.6123	-7.2572	9.09091	5.24737	91.3717	3.75668	-1.11404	9.05671	7.33298	48.4294	4.10867	14.2944	88.7588	5.33176	3.76728	-2.59217	4.78505	5.35055	4.00109
TBK1	2.13901	5.76578	-2.71578	-1.13143	0.416211	22.6757	-2.82857	3.86818	3.91309	1.417	-1.14894	17.2362	-2.45565	1.20701	7.80396	-1.44633	25.6868	24.1911	0.825286	-3.87918	0.0799148	-1.22782	98.2428	9.08938	0	6.26953	-0.585918	0.403185	11.9517	-1.18194	-4.46809	-2.92959	-0.809717	0.115432
TEC	95.7719	1.06153	-0.643826	16.26	0.674485	39.9244	4.20829	-8.1864	-0.988526	1.52526	38.3945	19.921	1.8395	-1.53292	97.3557	24.864	26.9747	43.7939	91.9153	7.15572	1.59067	3.12716	57.5387	86.4431	-1.54522	-0.058548	95.3823	5.66452	36.9338	15.8015	-7.52956	18.0612	-0.190658	95.6219
TIE2	-5.3564	2.04743	-0.712039	3.23194	2.63455	74.9276	-3.43563	-13.2516	19.4885	83.3203	81.0573	16.3147	-0.0949386	5.85059	72.2839	60.7963	0.787402	41.0643	29.0432	63.0636	1.84245	17.1008	29.829	3.72949	27.9994	14.1547	5.48615	78.8223	42.8406	-9.32917	-6.75477	-2.82455	-2.41621	2.00203
TNIK	-0.812046	31.0245	4.60207	29.7277	0.137218	18.9029	1.68435	24.6464	1.05942	10.7626	14.9791	26.585	5.24594	13.5951	20.0338	25.1425	31.1334	94.3319	-1.61871	19.4028	1.79848	7.17754	94.2027	83.8021	3.91116	19.8223	6.58427	27.6038	5.92633	2.29684	3.09623	3.88275	32.8286	6.43554
TNK1	-1.79974	10.9556	-4.23001	18.7462	-8.42064	100.728	-10.7236	100.6	4.2851	41.1671	100.323	34.6054	-2.71761	-3.39504	98.8972	-0.653801	28.2759	96.7363	6.17055	21.1046	-0.876212	96.8964	100.871	100.029	5.07084	37.4201	71.4372	17.0092	29.9776	-7.76053	-2.58065	4.3338	13.0296	1.65921
TRKA	12.7966	61.9227	6.61398	64.8628	-4.79794	83.4928	39.3962	25.686	17.9816	103.258	83.4838	6.31482	8.57575	-2.70164	99.9608	15.7054	7.01956	99.5621	59.1788	27.1577	99.2381	97.6851	99.7315	26.7406	14.0851	78.9698	96.0917	42.2217	33.2644	18.3139	-1.17329	19.9173	16.1991	8.82769
TRKB	13.8052	38.1279	-2.42925	48.1975	3.62343	26.6514	16.365	19.8326	-1.38508	101.625	85.8586	6.10463	-0.400785	7.41862	101.431	7.40226	-4.7532	98.0789	25.7839	5.95363	101.776	99.0267	98.6301	-0.700152	11.0579	75.0893	93.5079	64.4042	16.4479	4.08377	-3.39761	5.75916	11.3718	6.57915
TRKC	11.1164	30.6603	2.51715	56.5137	-0.842651	53.3133	18.5878	9.07563	-1.36855	100.426	80.8968	-0.0882029	1.92297	-0.540161	99.6597	11.5919	7.46032	99.7685	23.9016	6.26153	100.617	96.1487	102.293	-1.60864	-0.168199	80.5292	97.9948	53.7155	10.148	9.54607	-7.43243	2.53414	5.25568	-3.55461
TSSK1	-7.14656	21.6915	-4.79231	2.82549	0.848553	100.696	2.8576	101.229	7.3243	20.5809	8.0531	-2.47992	-4.21044	3.12753	8.13803	-1.86682	10.4956	94.8306	9.10168	3.2429	4.1326	84.2654	94.5049	75.5906	8.38412	11.963	4.54327	-4.29619	45.2802	0.947183	-5.04425	2.58468	-4.14938	2.12576
TSSK2	-3.11101	6.76772	-5.76227	1.34938	-5.22928	78.8573	-3.30597	74.9394	-2.32743	0.895522	-1.73378	1.19951	-1.36766	-2.44368	-7.35117	-6.00362	-2.97619	55.0851	-3.91325	-3.74452	-0.476241	56.1545	23.6707	-0.25653	-3.20669	-0.307566	8.25368	-3.7318	-0.888983	-4.25053	-1.73378	-0.922074	-10.806	0.571489
TSSK3	-7.85214	-3.58051	0.672547	-3.96986	2.62196	2.89383	-6.75167	8.00375	-5.05195	-0.600739	-8.10163	3.06577	2.92412	4.08402	5.68254	2.96311	1.91939	10.9173	-3.87479	-1.43437	0.549506	3.54793	-2.29634	-0.94083	-0.468098	9.65122	-4.78122	-0.0716675	-4.1213	-2.98464	-8.29338	-0.0289771	-3.18854	0.315457
TXK	67.6565	2.46055	-3.81738	20.2317	-3.08689	76.4466	2.34234	1.15391	0.165446	38.6521	18.3028	80.1459	-0.17673	-3.42857	97.8498	51.4168	41.4336	79.3767	98.3771	4.32432	16.0734	3.52283	24.7582	82.2737	-0.75325	6.33952	40.8366	11.1273	53.7723	3.19176	-4.6589	5.05792	5.15362	89.4302
TYK2	12.8042	13.5009	-3.98712	15.9993	-3.84783	23.3948	0.148295	13.1901	6.35116	20.6738	9.94236	6.51335	2.80317	-6.14608	95.064	0.748672	-2.2869	69.7639	6.93	-2.93294	-0.368074	4.89249	90.8618	9.22393	-6.39287	18.7838	90.9211	4.46056	3.39016	-3.0318	2.16138	4.71247	6.27871	-2.32468
TYRO3	3.11146	30.2053	1.52229	71.8222	5.2778	27.2927	6.96082	7.20324	4.54642	92.4754	0.194049	26.9981	5.91144	8.19875	20.2844	12.1706	26.2295	93.2545	11.9486	9.98726	5.58226	9.41967	30.9015	7.62947	4.09366	10.4859	96.8939	9.4789	98.8991	10.8793	-2.65201	6.05288	3.16456	5.50473
WNK1	5.36171	5.88838	-3.91556	-5.31595	-3.5027	5.08375	-5.18699	4.45469	-0.124351	-2.86624	1.13798	-3.84822	-3.11647	0.0799094	-2.18419	-1.95778	2.47525	-3.00054	2.30415	-4.59951	-4.4935	0.825731	5.36171	-1.87989	-3.58691	-1.23789	-2.66514	-5.13994	-9.89358	-2.62215	-1.42248	-3.92606	10	0
WNK2	0.786934	1.15813	-3.35676	0.928226	-2.48425	0.118782	-2.30095	-1.27691	4.95917	-3.8599	0.685976	-3.81025	-1.81774	-0.751333	2.24188	-2.41154	-6.43185	-1.03567	5.67186	1.04589	-1.91988	-0.739215	0.935412	4.60282	-1.88148	-1.80284	-1.04589	-1.63662	-2.36785	-3.90901	1.44817	0.536018	12.8663	1.99667
WNK3	-0.258753	0.436646	-2.88441	-0.0891663	-2.66915	1.05118	-1.76846	0.598367	1.84362	-8.32725	1.33829	-2.62213	-0.717515	-1.54983	8.50972	-1.80814	-5.51181	5.13501	6.84079	1.61985	-0.6	6.09887	5.2721	1.504	-0.585714	0.624317	0.505276	-1.09256	-1.48571	-1.42666	1.04089	2.97221	52.5931	5.7
YES	21.8424	43.6527	-3.81825	83.0364	2.15569	102.327	1.31756	30.8618	-0.706147	64.8688	90.7476	72.6069	-2.43748	3.55055	98.3163	80.6199	52.5504	97.7112	102.504	76.5534	-2.66127	28.2776	88.6375	13.2563	24.313	15.5175	94.7297	80.8982	84.3361	14.0141	-1.62842	3.63827	74.4898	70.6971
ZAP70	-1.5326	1.17759	1.1054	12.7962	-1.09357	73.5994	3.91956	10.226	-2.97861	20.8175	3.4662	-4.12821	2.08666	0.19507	2.19306	1.92114	5.66787	45.6847	-4.51121	-2.76675	4.691	5.95259	93.6618	17.8197	2.04931	-6.80968	8.64609	-7.80743	8.08517	-1.11438	-3.11958	3.35596	6.17871	1.90522
	*Inhibitor has been profiled prior to the current study. Data are retreived from DOI: 10.1371/journal.pone.0092146.
	$Inhibitor has been profiled prior to the current study. Data are retreived from DOI: 10.1158/1535-7163.MCT-18-0877.
