# Supplementary material for: Comparative kinase and cancer cell panel profiling of kinase inhibitors approved for clinical use from 2018 to 2020
Source: Front Oncol. 2022 Sep 14;12:953013. doi: 10.3389/fonc.2022.953013 (PMC9516332; doi:10.3389/fonc.2022.953013)
Supplement: Supplementary file 4 [file Table_4.xlsx]

## Sheet: Blad1
Supplementary Table S4. Cell panel data. IC50s (in nmol/L) in cell proliferation assays. For details, see www.oncolines.com. Data were stripped of ">" sign for analyses.																																			Genomic alterations
	acalabrutinib*	alectinib*	alpelisib	avapritinib	brigatinib*	binimetinib	capmatinib	ceritinib*	cobimetinib*	crizotinib*	dabrafenib	dacomitinib	duvelisib	encorafenib	entrectinib	erdafitinib	gefitinib*	gilteritinib	ibrutinib*	infigratinib	larotrectinib	lorlatinib	midostaurin*	osimertinib*	pemigatinib	pexidartinib	pralsetinib	ripretinib	selpercatinib	selumetinib	trametinib*	tucatinib$	vemurafenib	zanubrutinib	EGFR	FGFR1-3	ALK	MET	NTRK3	FLT3	RET	KIT	PDGFRA	ERBB2 amplification	BRAF p.V600E
5637	403.138	2187.85	12784.4	3956.95	1124.33	139.19	>31600	2490.25	452.09	1871.12	562.341	30.5189	28026.6	585.682	5558.17	3716.5	528	545.425	471.685	>3160	>31600	>31600	958.074	869.789	1398.78	18296.9	4555.5	2781.89	4530.96	7995.52	297.215	8877.07	25134.8	1889.34
769-P	>31600	9151.63	14280.3	3003.58	1909.7	229.34	>31600	2846.94	422.532	2585.31	1050.28	31.7802	31086	1187.57	6688.07	3451.83	260	1145.86	624.271	>3160	>31600	>31600	551.116	1562.09	2532.81	>31600	3147.66	2576.33	5716.94	665.396	94.7229	20220.3	>31600	4479.93
786-O	>31600	>10000	>31600	11776.2	2074.27	>31600	>31600	3278.04	205.377	2887.55	1685.45	3039.29	14203.2	1393.32	5116.28	5161.21	11307	946.583	446.941	>3160	>31600	>31600	1143.66	2611.03	2710.73	>31600	3958.13	2137.14	7500.61	>31600	41.8216	21285.3	25061	2187.94
A-172	>31600	>10000	19645.5	5909.92	888.32	20031.8	>31600	3938.91	218.467	2396.54	>10000	3620.9	>31600	1784.54	4965.3	13.4236	13913	1632.8	>31600	41.005	>31600	>31600	440.583	3659.46	29.1657	>31600	758.365	4957.55	1327.13	25329.5	235.344	17391.9	>31600	>31600
A-204	>31600	>10000	247.034	171.261	1271.45	>31600	>31600	2678.79	900.071	777.69	1994.67	2508.06	1184.51	1052	5981.4	30.9288	9866	392.483	29184	62.5137	>31600	>31600	333.526	1043.98	29.3925	934.925	679.189	520.392	2467.9	>31600	1230.62	11434.3	>31600	27888.7
A-375	>31600	>10000	14925.5	17791	719.221	86.4357	>31600	1608.01	12.6796	1947.14	70.6289	3460.09	23396.3	9.16735	5841.34	3196.04	11355	400.23	>31600	>3160	>31600	18810.8	732.77	3230.01	3027.24	>31600	12109.3	2918.28	4278.73	144.836	4.7849	11270.2	1755.59	>31600											BRAF p.V600E
A-388	>31600	2055.23	2908.72	>31600	1233.25	696.341	>31600	3642.52	171.121	3041.9	>10000	18.875	12403.8	1999.03	10268.8	5302.39	159	1297.65	252.61	>3160	>31600	>31600	2392.12	480.004	2764.48	>31600	2106.29	>31600	9591.49	>31600	99.3577	15919.7	>31600	999.742
A-427	>31600	>10000	73.7668	8014.56	447.655	625.032	29602.2	1454.44	72.4889	1151.81	2238.52	2892.28	14854.4	839.58	3493.38	109.018	7808	248.19	7613.17	1794	>31600	27448.7	298.395	2480.71	1.42896	24141.7	1099.06	1518.87	1530.4	1343.73	2.13041	22240.4	>31600	8546.69
A-498	>31600	>10000	14376.7	15447	1862.34	52.6327	>31600	4166.29	3910.04	2554.78	750.319	2569.32	3392.7	527.022	7973.51	3192.84	5809	551.786	10123	2970.59	>31600	>31600	641.904	1957.13	1133.95	>31600	8936.83	1137.77	6254.68	137.051	13797	20444.6	21631.2	5511.18
A-549	>31600	>10000	9894.73	20475.9	892.66	92.3067	>31600	4563.54	255.194	2336.3	2649.49	6633.61	23889.1	1216.82	8778.37	948.819	19667	630.394	>31600	>3160	>31600	2304.32	571.321	5744.8	4019.02	>31600	8164.75	2685.41	3755.36	131.874	7.86247	25690.2	31224	24745.4
A-704	>31600	>10000	27040.4	22649.9	3593.96	>31600	>31600	6188.13	>10000	4454.31	822.432	3905.46	>31600	5459.39	6864.59	5824.16	12928	962.43	>31600	>3160	>31600	>31600	658.417	3919.56	1281.58	>31600	2492.6	2215.39	2737.33	>31600	>28165	>31600	>31600	>31600
ACHN	12604.2	3520	9676.75	14829.2	893.878	32.0486	>31600	4778.05	104.443	3711.09	598.299	11.3789	7165.82	624.228	5786.32	2424.32	379	293.673	674.747	2754.52	>31600	>31600	685.817	389.7	989.243	>31600	2081.87	1469.07	2777.28	14377.1	5.82728	13873.2	20129.8	2751.6
AN3-CA	>31600	>10000	696.833	18053	1862.16	12811.9	>31600	4138.21	558.293	2245.78	2625.11	3746.22	4195.76	623.197	3780.91	23.2262	14014	1220.66	12670.2	203.209	>31600	>31600	792.07	4264.81	21.6847	25345.3	900.052	1012.66	575.742	2329.94	50.2386	24528	>31600	29803.5		FGFR2 p.N549K
AP-1060	>31600	1130.88	1738.64	3460.5	2400.27	18758.7	>31600	1773.67	7332.29	619.088	2519.61	3463.34	11300.1	2522.88	34.7348	7510.1	13323.9	416.841	>31600	3616.59	9.00152	10723.9	595.881	1942.59	3417.14	>31600	206.243	2833.61	3962.66	>31600	290.521	29143.6	31584.7	>31600					ETV6-NTRK3
AsPC-1	>31600	>10000	8970.93	>31600	809.029	115.585	>31600	1345.2	61.2879	2703.5	>10000	5823.22	>31600	2875.13	7993.3	10835.8	12547	545.439	>31600	>3160	>31600	28196.3	8954.05	4599.54	3164.73	>31600	25867.7	7562.89	>31600	210.471	13.9203	>31600	>31600	7825.51
AU565	684.633	>10000	1563.22	10107.6	2575.59	>31600	5517.46	3259.82	>10000	6527.03	980.851	68.1008	7674.25	420.518	8631.97	8487.56	576	1305.51	41.991	>3160	>31600	>31600	1311.6	118.016	3261.31	25429.9	8922.54	3755.02	2854.4	>31600	>28165	125.137	>31600	302.743										amplification
BT-20	>31600	>10000	3549.24	27677.9	4213.62	>31600	>31600	6050.01	>10000	10679.1	>10000	5621.8	29952.8	>31600	10680.7	6545.56	26607	4215.01	>31600	>3160	>31600	>31600	1038.77	10676.1	2838.82	>31600	12597.5	7425.95	3356.8	9262.45	>28165	28834.2	>31600	15076.5
BT-474	593.603	>10000	3194.55	7705.95	7879.57	>31600	>31600	3202.84	5991.19	5408.8	>10000	36.6651	9086.31	>31600	6152.26	8325.96	284.273	13901.8	27.817	>3160	>31600	>31600	835.862	85.4997	>31600	>31600	>31600	2228.03	28713.2	>31600	>31600	28.6334	>31600	212.699										amplification
BT-549	>31600	2707.55	16599.7	5182.43	3010.17	8674.95	>31600	3832.06	5714.73	3410.03	1529.35	3678.37	348.03	1014.84	7405.42	2973.41	14027	469.356	17487.9	>3160	>31600	>31600	1077.57	3484.84	16.6202	>31600	1930.83	4505.88	3820.67	>31600	313.567	15903.4	31225.6	12019.3
BxPC-3	>31600	>10000	5883.85	292.497	619.205	24.3047	>31600	1703.76	9.74591	2674.29	680.792	4063.74	16632.5	408.298	6086.22	4615.81	5117	409.462	1406.65	>3160	>31600	48.6613	654.992	93.5104	1195.83	>31600	3462.93	1505.79	3947.41	472.405	37.9164	12580.4	28165.2	3038.64
C-33 A	2008.64	1989.93	25062.2	4643.78	527.338	71.9933	>31600	4457.08	43.2881	6376.39	>10000	39.8684	9872.37	921.735	5226.53	4274.81	497	344.485	46.2629	>3160	>31600	>31600	718.974	153.747	2712.69	>31600	981.228	4825.06	2846.15	2.71904	4.4199	412.297	>31600	1102.31
CAL-27	>31600	1179.98	2315.46	10999.4	672.969	116.716	>31600	3022.19	63.1232	1653.13	>10000	11.4526	8889.29	6981.53	5149.86	3895.1	38	366.403	374.36	>3160	>31600	>31600	1682.55	288.995	2650.7	>31600	1953.37	9798.75	4408.49	60.5651	10.9145	13659.9	>31600	1367.42
CCF-STTG1	>31600	3022.3	>31600	5685.25	3442.06	>31600	>31600	4496.02	>10000	6556.1	>10000	5610.33	>31600	>31600	10715	11557.5	21553	4064.05	>31600	>3160	>31600	>31600	885.47	7184.78	>31600	>31600	5771.8	>31600	7964.35	>31600	>28165	>31600	>31600	>31600
CCRF-CEM	>31600	>10000	4280.76	8330.09	3604.06	>31600	28329.4	3891.43	8480.06	2103.05	1589.2	3265.67	915.809	>31600	9027.02	5396.15	11871	1689.32	8435.59	>3160	>31600	>31600	627.291	3600.34	3598.76	>31600	13301	4974.65	3451.73	>31600	>28165	17675.6	27574.3	13152.3
COLO 205	>31600	>10000	14099.1	10683.6	997.951	31.2132	>31600	1884.02	10.3068	1885.31	17.3165	4279.41	20526.4	3.31815	7716.19	6535.7	11939	1059.86	>31600	>3160	>31600	11882.9	682.637	3427.77	2980.84	>31600	12877.6	1867.88	4424.15	38.4482	3.91571	22212.5	744.354	>31600											BRAF p.V600E
COLO 829	>31600	>10000	>31600	10106.7	2559.88	124.854	>31600	3260.4	27.5295	4022.99	43.8743	6023.28	>31600	9.38545	8953.64	8663.34	14166	1221.9	>31600	>3160	>31600	>31600	6125.15	3832.47	3233.54	>31600	24681.6	2492.86	10672	116.576	16.1371	20568.7	2220.94	>31600											BRAF p.V600E
Daoy	>31600	3452.11	9360.47	27818	3070.95	3975.77	>31600	4950.68	>10000	2337.59	918.785	3767	12134.6	>31600	5096.18	5962.57	11663	3207.2	23104	>3160	>31600	>31600	516.326	4867.79	1405.48	>31600	10137.4	2059.48	3167.53	>31600	426.61	30243.7	>31600	23435.8
DB	>31600	>10000	23016.3	1553.15	2928.99	>31600	>31600	3985.94	8687.65	2849.13	1720.39	3596.18	>31600	1204.57	10457.5	4466.62	11598	893.285	21406.6	>3160	>31600	7722.48	584.837	2217.84	2835.88	>31600	13258.4	2177.78	3369.54	>31600	18943.2	19192.5	24462.9	16197.7
DEL	>31600	69.0095	27760.5	11878.8	7.04402	>31600	>31600	62.1864	4196.83	75.1049	>10000	2038.81	>31600	6414.9	215.678	4228.19	10656.7	2.57614	25977.4	3514.35	>31600	1.88388	790.24	1058.71	3199.87	>31600	16131.2	>31600	3363.16	>31600	>31600	>31600	>31600	21456.7			NPM1-ALK
DLD-1	>31600	>10000	675.723	15192.4	4725.18	522.221	>31600	4380.07	724.309	4722.04	1068.17	3239.89	18513.6	1652.92	10549.2	5128.64	10524	746.194	>31600	>3160	>31600	>31600	1596.27	4212.76	2271.56	>31600	9983.38	1540.65	8427.07	21437.6	506.98	23218.3	>31600	>31600
DoTc2 4510	9830.73	477.255	1295.66	16347.8	270.467	113.025	>31600	1189.59	42.0514	2000.84	>10000	11.809	8984.92	3275.85	4689.15	3774.5	42	317.508	208.815	>3160	>31600	23.9526	939.682	75.5741	3194.25	>31600	3502.76	6214.45	4183.12	31.6867	7.8616	5590.7	>31600	1502.64
DU145	>31600	>10000	533.989	9126.64	667.4	29.3648	>31600	3852.19	56.4283	3300.88	1081.03	17.8045	4238.13	592.485	7819.92	4836.61	173	237.455	147.783	>3160	>31600	25871.6	477.169	272.491	1605.01	>31600	2636.16	1966.07	3845.75	98.6922	75.9288	6879.24	>31600	1053.22
DU4475	>31600	>10000	627.827	7090.86	1789.11	37.643	21366.9	2182.66	17.0587	2052.12	55.4608	5242.23	>31600	7.76584	8215.83	14196.9	15893	1441.75	20119.4	>3160	>31600	25938.7	501.221	4542.62	5831.35	>31600	11790.4	3379.27	6244.02	88.0296	10.4566	10658.3	1831.42	18076											BRAF p.V600E
EoL-1	25789.2	192.589	334.838	0.567388	49.7369	82.4844	>31600	564.062	86.9	2085.97	2674.97	720.294	32.8967	2339.49	511.758	13.6989	2246.48	33.4146	346.525	ND	>31600	9048.78	8.29989	1069.71	1105.51	10.0551	15.5854	0.634119	289.709	92.2623	8.2147	4243.28	1616.05	2744.3									FIP1L1-PDGFRA
ES-2	>31600	>10000	>31600	3573.36	2093.57	187.584	>31600	2806.21	32.2704	2620.02	129.772	2993.75	>31600	100.079	4855.93	3038.22	13368	712.204	29834.4	>3160	>31600	>31600	2213.87	1718.27	1802.2	>31600	7668.87	2153.97	>31600	242.212	7.32779	18354.5	2332.29	>31600											BRAF p.V600E
FaDu	28477.7	>10000	1706.48	9298.06	970.709	47.1381	>31600	3248.85	145.591	4109.43	2628.49	12.7873	18679.1	963.543	5643.33	4927.35	155	459.333	95.2075	>3160	>31600	>31600	866.73	256.997	2599.16	>31600	3653.39	3053.38	4817.3	72.7359	18.5993	14074.8	>31600	751.453
G-361	>31600	>10000	16554.6	9283.13	9283.04	144.084	>31600	1513.26	10.7818	3311.77	47.0081	4113.33	22103.1	12.7091	4671.52	4466.78	5384	327.642	>31600	>3160	>31600	>31600	3140.55	1115.17	2572.01	23588.8	17619.2	2518.49	5864.63	224.631	5.46471	13477.4	3250.9	31378											BRAF p.V600E
HCC4006	17447.1	1328.07	4563.69	8006.76	152.384	26638.6	>31600	2728.38	1284.4	5935.15	>10000	1.18924	26016.9	>31600	4960.73	6256.06	11.9516	540.116	229.368	6218.57	>31600	17788.6	1071.49	10.7162	2625.2	>31600	5926.1	>31600	6744.75	26832.3	807.847	6557.58	>31600	1364.58	exon19del
HCC827	>31600	1589.19	5403.42	14047.6	129.453	267.83	8392.25	3712.92	320.78	5483.6	1271.51	1.12807	2175.8	892.55	2984.38	3101.07	10.4992	223.024	236.155	5003.92	>31600	17113.9	872.091	6.86223	3200.37	>31600	3007.88	3831.47	13457	9713.05	150.751	2380.12	>31600	1331.05	exon19del
HCT 116	>31600	>10000	6313.85	8758.36	1690.04	525.434	>31600	2718.96	106.095	1809.06	1110.7	2304.14	27577.5	1150.33	4662.15	4771.64	10969	418.2	26394.6	>3160	>31600	23786.2	1434.48	1557.73	2395.01	>31600	10301.9	3014.99	14921.1	2.25846	29.0014	21923.8	>31600	>31600
HCT 15	>31600	>10000	838.142	6359.32	3767.5	1068.95	>31600	3812.64	3576.81	3761.43	1514.89	3446.11	>31600	2941.59	7639.13	5470.21	11333	829.213	>31600	>3160	>31600	>31600	1117.03	3771.74	2821.74	>31600	5727.29	2559.52	10705.6	>31600	1740.5	16660	>31600	15722.7
HEC-1	>31600	1317.73	5838.61	17000.2	1813.7	>31600	>31600	2704.9	368.444	2224.97	1258.68	1910.7	11233.6	1572.55	3732.53	3204.91	10615.1	461.634	>31600	3040.42	>31600	9237.5	964.327	2055.27	2368.74	>31600	2316.51	1357.05	8897.48	>31600	329.782	13943.4	>31600	>31600
HEC-1-B	>31600	>10000	942.599	8742.31	367.243	12.1285	>31600	1960.42	13.359	3260.26	>10000	14.4651	4511.41	2096.37	2243.72	4168.51	462.046	269.721	293.991	>3160	>31600	>31600	499.838	151.423	2742.87	>31600	607.733	425.982	2069.3	26.5451	6.36219	1620.34	>31600	5586.57	p.A864V
HEC-6	>31600	>10000	7661.25	20876.2	5207.91	>31600	>31600	3251.11	164.02	4273.48	>10000	2511.22	>31600	1240.6	6832.63	5122.53	11090.4	1430.03	>31600	>3160	>31600	>31600	888.664	1458.72	2486.94	>31600	16906	1862.18	>31600	>31600	>31600	14809.9	>31600	354.852	p.A289V
HL-60	>31600	>10000	1685.64	5202.92	1113.3	5.02899	>31600	951.002	18.6545	1414.67	>10000	1736.83	4969.64	1799.58	5680.45	5046.04	15824	437.508	29660	>3160	>31600	28075.2	4528.22	1492.02	2454.33	>31600	25165.5	1815.21	5785.31	13.152	0.974208	16937	>31600	>31600
Hs 578T	>31600	4917.76	8511.92	16825.1	1394.3	142.808	>31600	4067.77	2215.52	917.997	1113.91	3094.3	2615.26	1029.13	7050.54	2195.31	13174	1192.13	15078.7	>3160	>31600	>31600	599.211	3560.89	3779.33	25675	1145.18	3726.09	3607.68	77.715	210.651	24107.3	30644.3	28391.4
Hs 746.T	9683.07	>10000	5755.46	1809.66	2135.48	12522.4	1.23269	3338.44	530.39	14.7816	>10000	3118.69	4430.55	1118.06	10905.6	3936.45	9246	511.785	30698.1	>3160	>31600	9425.38	1657.25	1977.78	1838.32	>31600	9642.96	3105.46	28064.3	19406.6	81.9505	12439.6	>31600	>31600				exon14skip + amplification
Hs 766T	>31600	>10000	7450.77	>31600	2535.57	33.4484	>31600	3519.86	6.02491	3604.95	>10000	5007.03	18643	1905.19	7078.78	6105.24	19430	342.512	>31600	>3160	>31600	>31600	1513.19	2764.25	5655.51	>31600	3299.52	4701.06	4971.37	22.2757	2.3436	>31600	>31600	>31600
Hs 852.T	>31600	2417.21	5784.57	8758.06	329.658	271.423	>31600	1867.24	591.907	2436.15	1424	3746.81	21441.5	3366.91	4090.26	6304.88	14650.2	192.658	>31600	5373.57	>31600	19706.1	579.673	3068.78	2136.32	>31600	10839	>31600	5901.53	345.17	218.202	>31600	>31600	>31600
HT	>31600	>10000	14339.9	22904.9	4537.19	>31600	>31600	4738	>10000	3167.29	>10000	3763.6	4635.35	>31600	11995.1	12197.9	17582	3411.98	902.053	>3160	>31600	>31600	4809.87	3949.41	>31600	>31600	>31600	>31600	4862.27	14834.2	>28165	29875.9	>31600	>31600
HT-1080	>31600	7551.92	313.832	9143.14	1663.89	26.809	>31600	2000.81	67.8454	1497.75	970.902	2788.96	3967.53	380.76	7362.42	2501.29	9538	202.035	>31600	2986.56	>31600	>31600	329.944	3038.9	1062.18	>31600	8099	1702.3	5160.67	131.634	28.0757	17149.6	9431.19	>31600
HuTu 80	>31600	>10000	1088.28	5134.11	451.141	3320.37	>31600	1666.08	319.472	821.169	2992.71	4064.18	15034.7	1115.97	3571.39	3.57945	2607	509.399	3662.76	39.3238	>31600	7502.16	354.939	2130.29	3.57748	22844.7	863.916	1580.93	1352.52	412.753	128.76	622.563	>31600	961.301
11-18	25181	>10000	15504.1	2372.69	552.941	>31600	>31600	2091.74	>10000	3183.95	>10000	1.99874	12920.1	>31600	4170.62	10723.6	99.5954	580.317	101.569	>3160	>31600	12324.8	1717.3	30.6055	>31600	>31600	2065.71	8143.88	4081.86	>31600	>31600	824.662	>31600	506.461	p.L858R
J82	>31600	>10000	>31600	24401.3	1881.07	200.35	>31600	4502	85.3857	4884.75	>10000	3947.69	23779.9	948.961	7154.83	5498	14053	372.497	25502.6	>3160	>31600	>31600	1971.81	5514.44	1128.12	>31600	1744.33	2302.43	3303.63	264.842	>28165	>31600	>31600	>31600
JAR	>31600	>10000	23221.4	7186.77	3047.56	>31600	>31600	3578.84	6287.81	1376.54	1533.92	3051.79	233.622	419.136	5042.31	2676.44	9217	476.04	23676.3	2992.47	>31600	>31600	560.757	2281.95	2193.11	>31600	5160.27	2388.91	4400.19	>31600	>28165	24143	14719.5	11367.4
Jurkat E6.1	29605.5	>10000	12945.1	4068.46	4383.33	>31600	>31600	4073.72	>10000	1334.78	1297.49	3182.61	6936.99	1035.22	8242.79	3730.06	12498	749.027	10814	>3160	>31600	>31600	2451.38	2270.76	2886.98	>31600	11400.8	2642.95	4030.87	>31600	>28165	14747.7	28256	19065.9
K-562	>31600	>10000	>31600	6032.1	2738.11	383.375	>31600	3974.27	73.3603	284.864	>10000	3435.31	12270.9	27632.5	5816.2	1504.25	10804	1538.6	7324.28	>3160	>31600	9612.3	1898.36	1458.58	3769.46	>31600	5581.88	1848.95	5504.65	240.559	21.7481	8528.16	>31600	>31600
Kasumi-1	>31600	1529.82	1894.8	74.893	207.333	191.942	24990.5	1043.35	62.3356	1384.59	9049.74	1628.36	5786.66	3015	3675.1	142.494	9350.13	219.292	7916.54	3415.98	>31600	>31600	319.611	1626.75	1288.45	227.59	184.054	55.1062	277.07	344.743	28.6478	24334.2	>31600	3364.02								p.N822K
KATO III	31255.8	>10000	2788.29	6659.93	210.855	5395.76	>31600	2360.52	290.758	1984.32	1773.36	2960.81	23117.2	1512.73	1431.22	2.31479	8944	717.575	1037.81	7.76964	>31600	>31600	423.573	2496.2	1.76531	10109.9	272.587	676.214	240.994	16485.6	141.909	17882.2	20733	5473.42		FGFR2 amplification
KG-1	>31600	441.538	27740	1916.64	242.669	403.63	>31600	3852.96	26.1463	564.29	1213	2566.59	>31600	1440.98	1530.98	3.05139	11712	392.194	1355.28	2.29057	>31600	9214.66	427.034	210.414	1.07548	7507.92	130.827	589.933	227.468	10.2608	8.9113	16176.8	>31600	2852.89		FGFR1OP2-FGFR1
KLE	>31600	>10000	5789.99	5613.68	552.505	>31600	>31600	3578.44	>10000	9675.03	1564.33	3437.45	4372.59	822.051	4324.91	4938.49	286	316.708	75.3698	>3160	>31600	>31600	2299.81	148.868	1818.83	>31600	1819.12	9977.14	5599.97	>31600	>28165	4737.29	>31600	2734.83
KMS-11	>31600	>10000	1530.28	6592.78	429.67	>31600	9301.34	1313.59	4121.64	2076.75	>10000	3536.14	11426.1	3390.31	4823.51	13.0061	7862.68	911.945	27854.5	25.8749	>31600	17699.9	1275.15	1631.86	15.6013	>31600	393.822	4569.44	660.59	>31600	>31600	18221.1	29481.9	22566.6		FGFR3 p.Y373C
Ku812	>31600	>10000	75.3756	3108.87	1389.7	29.9904	>31600	1884.2	63.5609	269.429	8654.4	3195.22	12830.7	2573.92	4720.73	443.342	12907	1511.38	2806.35	>3160	>31600	>31600	1357.65	1891.47	4664.12	>31600	3743.29	850.128	3538.24	73.404	13.4261	22633.6	28464.9	12346.6
L-82	>31600	36.91	20497.6	8390.15	6.36831	1905.08	>31600	33.3969	249.731	47.2336	>10000	1649.01	22105.4	8753.96	125.493	4424.71	6286.59	2.01829	17740.5	3617.92	>31600	1.21884	896.358	1060.79	4103.57	>31600	11085	3028.5	5224.53	950.123	86.1126	>31600	26819	17640.9			NPM1-ALK
LC-2/ad	19606.4	1112.35	4498.38	4907.59	334.273	83.6074	>31600	2021.99	1190.73	1940.46	2073.97	2888.6	95.0005	1527.08	1812.76	70.7805	6506.2	157.566	1829.33	3447.26	>31600	20404.7	710.314	3238.65	3276.57	>31600	53.5922	5384.27	18.2808	31025.5	167.383	22546.9	>31600	16544.8							CCDC6-RET
LNCaP clone FGC	>31600	>10000	>31600	15958.6	688.595	>31600	>31600	3720.33	9636.34	6398.25	2732.03	7972.05	119.139	2149.87	10872.4	11194.8	20701	6815.08	>31600	>3160	>31600	>31600	>31600	4554.7	3092.15	>31600	>31600	4878.02	16786.1	>31600	>28165	21813.2	>31600	13712
LoVo	>31600	>10000	20529.9	6424.6	2016.33	23.2717	1.85631	3471.58	118.286	1401.72	4355.79	4300.71	9256.59	2501.67	9517.71	3955.47	213	413.461	>31600	>3160	>31600	>31600	745.339	3786.13	2701.44	>31600	1518.71	3039.32	766.88	33.6735	32.0967	25728.9	>31600	24902.2
LS174T	>31600	>10000	1896.82	6555.41	1333.29	70.3225	>31600	2004.01	24.6842	1507.24	>10000	2668.73	31164.1	1698.46	4902.04	9971.71	5604	651.613	11618.2	>3160	>31600	14156.5	726.848	2708.97	3688.4	>31600	2285.13	9306.13	4206.59	176.689	29.7683	20251.8	>31600	11453.8
LS411N	>31600	>10000	17417.4	10830	1764.71	60.7361	>31600	1965.29	21.1743	2447.85	22.2618	4239.62	26280.1	6.12649	9549.78	10824.9	19534	1150.31	22992.1	>3160	>31600	23585.2	1237.58	6019.13	5904.71	>31600	25580.8	2721.36	3756.97	75.198	9.3919	21391.7	1280.41	12402.3											BRAF p.V600E
MCF-7	>31600	>10000	2789.49	17286.9	601.449	>31600	>31600	2768.7	8552.18	3758.12	>10000	12911.7	11803.8	>31600	3834.32	17397.9	18458	513.656	>31600	>3160	>31600	17029	3266.72	10162.7	>31600	18071.3	>31600	>31600	>31600	>31600	>28165	30519.9	>31600	>31600
MDA-MB-231	>31600	>10000	>31600	8496.79	1995.13	1012.1	>31600	782.108	192.09	2402.18	>10000	3690.85	>31600	2424.52	4586.92	6703.79	15706.1	1501.21	>31600	>3160	>31600	>31600	920.375	3140.67	4511.2	>31600	555.372	1259.2	28011.9	1003.61	43.6247	22472.6	>31600	>31600
MDA-MB-453	>31600	>10000	6028.85	1079.42	6650.44	>31600	>31600	943.927	501.228	7669.12	>10000	3249.02	>31600	>31600	11516.7	11359.4	10920.5	8823.59	411.369	654.861	>31600	>31600	7639.38	294.387	>31600	>31600	>31600	3528.57	>31600	9172.75	270.309	5928.35	>31600	4194.22
MDA-MB-468	>31600	>10000	9804.26	12603	2014.3	64.3935	30759.2	4449.22	248.355	2371.44	>10000	32.6853	1299.12	>31600	11003.4	1835.64	250.201	4890.41	1041.97	>3160	>31600	>31600	801.01	528.417	728.628	>31600	8523.85	2473.36	5498.77	>31600	151.108	8881.42	>31600	3896.93
MeWo	>31600	>10000	>31600	>31600	>10000	117.226	>31600	3195.61	329.739	3595.51	1023.94	3917.08	28118	1002.95	10105.6	10044.1	12716	336.1	29117.6	>3160	>31600	>31600	2757.8	3833.81	2813.37	>31600	6969.66	3579.19	5534.04	5400.18	35.6999	>31600	>31600	>31600
MG-63	>31600	>10000	3869.93	11120.8	1052.42	2218.97	>31600	3042.28	420.609	2620.58	>10000	4002.71	7803.59	>31600	3802.5	2391.21	13291	376.515	>31600	188.97	>31600	8738.65	628.714	4409.95	10.6309	>31600	1877.08	12274.1	3084.32	6085.77	256.73	29445.6	>31600	29340.2
MIA PaCa-2	>31600	>10000	10742.6	10990	1189.22	139.937	>31600	2186.68	68.3866	1612.2	>10000	3931.9	12924.7	1241.22	5156.61	7048.86	13841	340.079	>31600	>3160	>31600	>31600	1639.88	2613.96	5733.56	>31600	1561.77	24217.8	3403.6	220.877	33.0975	18259.6	>31600	>31600
MKN45	>31600	>10000	1234.38	5031.46	2641.06	1153.56	3.82978	3523.25	294.01	62.4749	>10000	4255.06	2359.42	3808.6	11805.6	6357.26	11702.5	1481.95	>31600	4258.77	>31600	>31600	1235.79	3116.13	2318.59	>31600	>31600	>31600	>31600	2674.68	83.4718	17124.7	>31600	>31600				amplification
MOLM-13	9380.46	989.756	3474.96	465.451	57.7739	1029.76	6012.78	994.812	172.381	443.959	5703.74	1165.44	4.0053	1071.09	214.404	1031.89	1459.5	4.01909	425.512	3990.92	12569.9	21106.3	14.4195	726.673	3535.39	191.41	33.2268	238.163	122.641	821.923	33.6893	14315.1	8900.49	2060.56						FLT3 ITD
MOLT-4	>31600	>10000	701.43	6634.03	1949.15	>31600	>31600	3755.8	>10000	640.875	>10000	3642.66	5914.84	1671.22	11270	3490.27	11681	1002.1	1877.31	>3160	>31600	6724.05	600.942	2859.02	3588.71	>31600	9351.34	3832.5	1666.81	>31600	27623.7	20267.8	30598.5	16493.3
MV4-11	>31600	1065.75	10495.8	470.188	32.9074	511.073	1954.27	1228.66	110.539	829.177	8023.16	230.18	14.1849	2276.17	280.554	3342.05	1462.59	0.832292	1010.4	2567.79	26458.8	15590.4	14.6688	688.146	2491.76	254.354	87.421	578.263	167.154	177.953	21.8243	19080.5	31206.7	3716.92						FLT3 ITD
NCC-IT	>31600	>3160	8352.93	3516.03	2683.4	12108.8	>31600	3108.67	1286.2	1469.05	1162.7	4434.17	10550.7	1043.95	6381.67	29.0467	15822	307.103	5101.43	465.996	>31600	>31600	767.155	2740.76	22.2162	>31600	1656.42	1725.11	1576.33	25943.3	870.545	>31600	25481.2	11355.3
NCI-H1650	>31600	1655.85	18142.2	19618.9	672.517	8559.3	9454.12	3377	526.898	3697.66	>10000	5.94968	11003.9	>31600	2441.76	4356.81	28.9454	471.197	110.185	5095.29	>31600	23939.4	1415.77	26.9566	3302.09	>31600	2555.5	>31600	7358.49	>31600	75.0477	>31600	>31600	13881.2	exon19del
NCI-H1975	>31600	742.717	1490.12	11099.2	449.28	201.272	>31600	1920.43	97.9074	3381.61	1420.15	153.239	7771.89	1441.6	4152.28	8604.71	10166.9	494.632	575.609	>3160	>31600	9886.3	670.041	5.43392	2967.59	>31600	6508.14	2167.51	22431.9	1924.44	85.4221	24517.4	>31600	4603.94	p.L858R + p.T790M
NCI-H2228	>31600	38.7297	4041.68	9990.29	7.7775	16.104	>31600	37.5756	721.091	81.7099	2202.16	4887.36	13788.9	2304.01	196.326	6692.76	13854.4	1.83989	29900.5	4376.01	>31600	0.918337	1146.96	1436.92	2770.32	>31600	7941.86	4139.88	10226.8	294.059	264.71	>31600	>31600	>31600			EML4-ALK
NCI-H460	>31600	>10000	7110.25	15996.3	1377.17	120.095	>31600	3155.67	76.8862	2501.18	1153.98	4685.42	11070.2	1162.88	9993.66	5960.67	14906	499.274	>31600	>3160	>31600	18426.7	520.858	5390.94	2749.6	3329.77	9396.48	1624.53	4266.61	297.136	32.7309	30374.3	26874.1	>31600
NCI-H661	10964.9	>10000	9626.37	1664.38	402.179	3307.86	>31600	3465.59	>10000	6615.25	>10000	3683.3	3218.56	821.346	4030.25	6395.85	19765	233.335	122.892	>3160	>31600	6729.08	528.054	4806.38	2435.75	>31600	2098.4	11782	8676.69	>31600	>28165	26884.9	>31600	612.417
NCI-H716	>31600	2505.92	49.33	6805.62	201.025	26.8594	>31600	1548.04	921.115	1598.8	1169.46	4906.97	5312.36	9563.61	1464.37	3.37776	11748	584.456	1303.13	20.3206	>31600	9518.41	585.865	3729.21	2.34385	16958.2	244.494	1443.44	262.419	197.099	33.7852	29537.3	>31600	11725.9		FGFR2-COL14A1
NCI-H82	>31600	>10000	11065.7	2418.52	1978.53	>31600	>31600	1570.95	8222.2	1594.33	1118.56	3907.25	>31600	1068.8	9697.4	3761.03	10106	300.497	18444.2	>3160	>31600	6060.86	782.376	4151.17	1398.31	>31600	10866.1	1108.27	3224.69	6837.71	>28165	20436.4	22822.9	>31600
OVCAR-3	>31600	>10000	6104.76	22063.9	939.338	>31600	>31600	5140.63	>10000	7278.7	1039.6	23.4301	617.106	694.609	8353.77	10468.9	134	591.257	199.934	>3160	>31600	>31600	2106.11	3129.63	3131.24	>31600	4108.78	2003.71	5668.26	>31600	>28165	>31600	>31600	1526.24
PA-1	>31600	7916.6	17554.1	12282.3	918.177	1352.77	>31600	2078.31	495.723	797.164	1707.5	2697.14	10656.6	840.605	3027.13	2489.12	7637	489.012	12656.9	2146.3	>31600	>10000	481.126	1442.67	1407.89	17318	4498.39	2054.71	1817.59	556.056	665.92	21058.2	15650.2	1243.23
PC-3	>31600	>10000	22680.7	>31600	2016.8	>31600	>31600	4055.11	>10000	2844.55	>10000	5256.69	5806.46	1373.88	10961.8	8351.74	19273	888.817	>31600	>3160	>31600	>31600	1338.32	9360.55	5599.65	>31600	6081.25	13164.6	3852	>31600	>28165	26835	>31600	>31600
PFSK-1	>31600	3485.11	520.319	13780.6	591.927	>31600	>31600	1536.32	>10000	2155.93	>10000	4476.53	13137.8	1002.2	7814.81	9387.19	14512	319.362	25647.5	>3160	>31600	7690.94	2054.31	3885.8	3857.84	>31600	16723.6	7997.14	>31600	>31600	>28165	19030.4	>31600	18004
RD	>31600	>10000	1148.32	>31600	1015.44	39.8073	>31600	1709.93	91.5969	2274.38	1793.41	2526.76	27606.6	1626.55	5088.28	2320.1	11162	290.221	29081.2	>3160	>31600	27018.7	745.735	2512.02	2661.31	>31600	14573.7	2740.14	6942.1	59.1264	4.01683	28827.7	>31600	>31600
REC-1	20.6825	1243.54	3143.69	28863.5	1321.84	>31600	3019.84	2213.97	6393.39	3502.32	974.5	845.091	14442.8	8526.32	5019.4	5914.84	7775.12	1387.86	0.511343	3997.69	>31600	8257.91	363.15	1529.29	3534.08	16003	6581.57	5271.32	7323.74	>31600	12329.3	11984.9	8155.27	3.11096
RKO	>31600	>10000	11044.2	4913.98	3461.77	29.3807	>31600	1627.7	38.4214	1901.17	11.1537	3580.15	8822.49	244.431	4676.62	7025.25	8273	1336.13	>31600	>3160	>31600	2737.15	1762.66	3582.12	3420.84	>31600	11298.9	3556.7	5122.82	366.728	8.39893	13082	3078.95	17881.1											BRAF p.V600E
RL	>31600	>10000	18884.2	3941.65	5833.83	>31600	>31600	4058.81	>10000	2633.43	>10000	4152.97	24039.1	29242.3	10918.4	5473.66	13089	2603.06	3053.89	>3160	>31600	28277.9	2892.81	3916.31	3078.85	>31600	5671.15	3186.87	2061.63	>31600	>28165	23968.2	24828.8	9800.24
RL95-2	>31600	1326.05	18320	28309.4	651.921	23.8964	>31600	1757.38	34.1149	1265.8	2991.1	7.79974	3598.43	924.026	3316.9	4449.37	35	177.489	32.3369	>3160	>31600	35.3877	706.629	49.5919	2383.71	>31600	1391.85	1132.26	2282.02	11.8214	1.55478	1760.94	>31600	1170.66	p.A289V
RPMI-7951	>31600	>10000	10083.8	13534.2	1278.02	198.535	>31600	3675.25	20.0348	2086.99	42.6541	3969.13	2809.91	13.4536	4024.24	5986.67	11169	644.721	26921.4	>3160	>31600	817.984	567.677	3630.29	2980	26501.2	2789.21	6447.88	5589.17	143.442	16.7812	15793.7	15713.6	>31600											BRAF p.V600E
RS4;11	>31600	>10000	4245.97	21033.7	473.173	>31600	>31600	1075.52	>10000	782.649	1207.43	3356.52	9200.67	925.245	8239.31	5105.97	15495	388.443	>31600	>3160	>31600	11234.1	492.817	2202.45	1326.11	>31600	14734.2	1168.84	1626.46	18230.4	>28165	24447.2	>31600	26537.4
RT-4	>31600	>10000	119.643	4919	253.645	18991.3	>31600	4049.62	299.043	3562.2	>10000	13.8391	9682.11	3773.52	2938.17	4.90947	149	1392.66	3470.02	13.9561	>31600	>31600	1231.61	65.3811	5.07843	>31600	452.627	2987.28	1383.45	21255	71.8783	9989.18	>31600	8074.57		FGFR3-TACC3
SHP-77	>31600	>10000	>31600	2223.77	5192.03	>31600	>31600	3401.63	>10000	3384.22	>10000	5075.39	>31600	>31600	12698.3	16050.8	18780	2468.04	>31600	>3160	>31600	>31600	2184.2	6743.42	>31600	>31600	>31600	>31600	8175.41	>31600	>28165	22761.2	>31600	>31600
Rh30	>31600	>10000	3907.66	14852.8	463.73	>31600	7372.97	1013.84	3409.02	1573.59	>10000	3925.77	12150.9	1076.26	4640.32	37.3418	13806	355.041	25701.8	525.235	>31600	9219	1552.14	3964.38	137.384	>31600	6617.05	3004.4	4030.4	>31600	236.907	25838	>31600	17410.2
SK-BR-3	409.368	>10000	676.29	8314.36	1360.4	>31600	>31600	3911.02	>10000	8761.68	1570.96	26.8324	2333.88	>31600	11053	8267.52	79.8288	12479.3	11.2845	>3160	>31600	>31600	780.237	46.5859	834.82	>31600	3883.3	2043.93	22556.3	>31600	>31600	22.384	>31600	140.628										amplification
SK-N-AS	>31600	7730.39	64.6031	20842	617.583	13.5251	>31600	2092.1	12.2573	1842.12	3020.03	3084.97	>31600	1114.25	5339.27	5702.93	14521	438.822	>31600	>3160	>31600	>31600	635.121	2351.02	2832.87	>31600	4648.62	2366.3	3807.97	20.4855	3.80986	25206.8	>31600	15524.2
SK-N-FI	>31600	7436.73	3096.38	>31600	1093.36	797.683	>31600	536.735	81.8069	2165.56	>10000	3361.97	>31600	3285.27	4055.7	2538.47	16527	242.179	>31600	>3160	>31600	21487.6	918.922	3229.48	3037.75	>31600	4144.24	2916.61	4004.28	8409.06	33.518	>31600	>31600	>31600
SK-N-MC	>31600	>10000	2602.71	6432.07	400.702	>31600	>31600	708.56	7628.26	1046.42	1782.21	2942.49	12181.6	975.851	4618.82	5488.61	10299.2	241.556	1519.06	3206.29	>31600	6170.91	681.036	2403.01	2597.75	>31600	10431.3	4758.24	3280.92	>31600	>31600	15130.8	>31600	23120.5
SK-N-SH	9868.63	2428.02	420.307	7423.78	366.927	59.2844	9698.76	875.324	37.2498	842.793	2139.69	2472.31	12590.8	1110.89	2796.9	3865.9	6918.62	415.034	26347.9	4474.45	>31600	5693.51	325.648	1451.79	2225.69	>31600	1652.84	3606.49	2592.78	65.6654	17.2435	24917.3	>31600	>31600			p.F1174L
SNU-16	>31600	>10000	>31600	2028.17	375.864	9726.2	>31600	3801.92	2487.2	1916.42	>10000	3881.25	>31600	1753.46	2130.01	4.58041	12283.7	1089.61	1595.87	28.0486	>31600	31472.1	584.541	4398.61	1.92125	8755.01	134.552	772.588	303.554	>31600	146.486	20495.4	>31600	8536.38		FGFR2 amplification
SNU-5	>31600	>10000	13948.9	9358.61	2150.99	1463.58	0.95083	3865.56	47.2903	11.088	>10000	3409.25	11240.4	7361.4	9582.89	8451.06	12163	465.673	17612.7	>3160	>31600	>31600	1703.21	2562.09	5254.59	>31600	>31600	30213.8	>31600	1310.47	12.0955	24581.1	31402.5	8939.02				amplification
SNU-C2B	>31600	>10000	7044.72	10469.3	741.106	176.238	>31600	2540.29	324.1	4803.85	>10000	5590.3	9361.48	9594.2	8116.69	19705.6	82	351.889	300.397	>3160	>31600	>31600	3352.85	2420.54	>31600	>31600	19599.5	15665.3	>31600	36.1876	40.6745	>31600	>31600	866.315	p.R165Q
SR	14683.7	328.358	10943.5	6298.74	20.0396	4026.96	20481.4	200.333	508.504	193.677	1757.63	3550.59	14052.5	921.219	720.21	596.767	11192	21.7213	13221.3	>3160	>31600	6.25056	410.579	1701.66	1444.34	27347.7	8136.11	2682.01	2585.41	25484.6	935.846	16801.5	7505.59	12888.3			NPM1-ALK
SU-DHL-1	>31600	431.696	21221.4	2305.11	34.9396	2844.71	>31600	191.806	477.848	181.663	>10000	3508.83	22591.9	2151.94	606.892	2865.63	8185	19.2529	>31600	>3160	>31600	7.80548	1890.94	2433.78	2797.54	>31600	11392.8	2784.4	2758.82	7708.82	279.11	15747.5	23493.8	16810.9			NPM1-ALK
SU-DHL-6	3.10252	>10000	1552.52	3180.25	1341.54	46.9294	>31600	2945.61	2017.07	2187.3	2610.74	2546.79	1.77144	5812.68	7735.39	3679.54	11269	992.649	11.8984	>3160	>31600	24118.5	843.934	1816.18	5116.64	>31600	1933.73	8191.24	4614.11	>31600	27.4523	15274.9	>31600	3.75489
SUP-T1	>31600	>10000	6015.59	9112.68	1479.96	>31600	>31600	3495.92	>10000	1738.95	>10000	4542.74	29294.3	>31600	10975.6	8045.34	13061	955.527	1314.24	>3160	>31600	23196.8	6630.65	4961.7	4281.14	>31600	30699.8	2459.65	2326.67	>31600	>28165	>31600	>31600	17543.6
SW48	4428.97	>10000	1148.1	5581.44	713.42	14.2409	>31600	1292.19	58.8476	1024.11	3009.41	0.635761	5940.43	2233.55	5306.58	9310.15	4	285.934	21.3613	>3160	>31600	8619.24	432.801	91.7864	8066.1	>31600	4565.64	2837.56	2740.18	34.4464	6.20715	17373.3	>31600	43.3619	p.G719S
SW480	>31600	>10000	8848.02	25449.5	1088.85	738.748	>31600	2442.93	342.167	2662.11	2992.57	4826.57	30485.1	1224.06	6926.4	8990.37	12828	1355.78	>31600	>3160	>31600	>31600	1035.58	4088.73	2960.59	>31600	15438.4	3598.03	4025.49	28.906	230.061	>31600	>31600	9564.73
SW620	>31600	>10000	6936.81	>31600	979.712	17.6896	>31600	1555.15	92.7455	1368.58	>10000	5176.9	20137.9	1812.88	6333.53	10540.2	26894	526.844	>31600	>3160	>31600	16955.2	916.163	6364.21	3491.6	>31600	2462.87	1896.36	2619.63	23.8664	16.5468	>31600	>31600	4746.76
SW626	>31600	>10000	8633.29	20177.2	1296.63	32.1656	>31600	3426.47	145.634	2953.35	>10000	5243.88	24922.8	2435.86	7377.37	8939.9	12976	550.87	>31600	>3160	>31600	8558.79	1644.18	3861.34	3558.86	>31600	9629.42	3914.27	>31600	44.3192	58.8071	23508.8	>31600	2707.4
SW780	>31600	1671.68	9848.79	19339.2	316.748	272.213	>31600	2072.86	126.662	3854.9	>10000	4604.5	>31600	19831	2853.07	9.27839	1280.5	483.41	18710.8	38.6196	>31600	16004.5	2312.86	1650.88	7.64976	5066.09	1407.62	30736.7	1945.87	446.635	20.2405	22719	>31600	5816.09		FGFR3-BAIAP2L1
SW837	>31600	>10000	21930.4	>31600	663.433	110.018	7226.63	2942.33	137.443	4012.91	>10000	6483.56	25893	>31600	8374.6	10697	18157	1946.82	>31600	>3160	>31600	>31600	2735.5	4232.89	6225.87	>31600	12857.9	7363.69	3484.12	219.973	98.3584	>31600	>31600	6003.4
SW872	>31600	>10000	18787.5	6309.83	779.586	33.7626	>31600	2778.98	45.5304	2228.68	25.3844	5030.38	23693.6	7.22965	6091.79	8172.91	14593	301.841	>31600	>3160	>31600	6649.06	721.353	4640.44	2501.89	>31600	5577.3	2459.38	5774.9	24.9573	23.1199	31369.9	1150.97	>31600											BRAF p.V600E
SW900	>31600	>10000	4430.63	21890.2	536.581	77.2277	>31600	2339.03	295.003	2303.07	1117.31	4741.94	7571.54	1385.89	6639.09	6502.22	12947	314.937	>31600	>3160	>31600	15126.4	718.545	4869.14	1920.88	>31600	5112.35	9134.09	5032.3	34.7252	111.369	>31600	26741.5	5841.86
SW948	>31600	>10000	3298.6	14011.4	1440.66	81.8002	>31600	2278.19	87.0233	2660.63	2720	4802.38	12723.8	3232.16	9440.11	9767.52	19387	788.735	>31600	>3160	>31600	17027	1037.9	4609.79	1927.86	19938.8	15094.6	1679.32	3917.35	62.0782	25.7855	>31600	>31600	>31600
SW982	>31600	>10000	22628	10763	489.722	165.91	>31600	4150.49	1695.86	1454.42	1155.27	3939.88	4209.29	549.066	5313.99	2213.37	19646	322.643	>31600	>3160	>31600	52.0152	175.59	5096.81	1275.78	>31600	1615.07	2260.8	3569.59	971.701	928.53	>31600	22271.3	>31600											BRAF p.V600E
T24	>31600	8718.04	1083.2	27988.8	2552.75	59.6438	>31600	4044.46	42.7731	2934.04	1173.97	3025.16	31155.1	1054.46	7120.87	4645.34	13497	329.227	>31600	>3160	>31600	>31600	724.739	2763.41	2287.62	>31600	6553.92	2141.13	5153.57	92.4259	4.78538	20123.7	30682.3	>31600
T98G	>31600	>10000	7139.76	372.231	1341.17	11936.5	>31600	4704.07	3341.86	3743.21	>10000	4588.91	4797.76	1673.72	5589.95	63.9202	16353	818.742	20631.5	134.591	>31600	11398.3	682.432	8763.88	3536.54	>31600	785.204	3468.64	2687.1	>31600	>28165	30058.4	19083.9	>31600
TCCSUP	>31600	3699.91	1100.2	2703.25	1414.9	363.351	>31600	3818.42	483.048	3539.84	2077.83	3386.69	21574.3	740.065	6418.63	4452.44	11819	326.357	18089.1	>3160	>31600	>31600	680.456	4313.67	606.385	>31600	5548.52	1293.26	3125.53	>31600	1448.3	30424.8	>31600	>31600
THP-1	>31600	>10000	117.473	5417.92	6382.81	16.6782	>31600	4755.37	20.4652	4954.54	>10000	3911.73	150.243	2463.12	12920.5	12018.1	22842	1119.28	>31600	>3160	>31600	>31600	5168.95	7195.07	4231.87	>31600	>31600	980.857	>31600	24.7522	1.02337	>31600	>31600	>31600
TT	>31600	8096.18	>31600	8194.88	675.743	1748.9	>31600	3833.63	224.637	3731.75	>10000	4827.31	>31600	5092.51	9257.13	128.958	13297	177.724	7123.71	>3160	>31600	>31600	755.689	4149.72	6940.4	>31600	55.3166	2813.94	18.506	>31600	1050.72	>31600	>31600	>31600							p.C634W
U-118MG	>31600	3327.32	16643	1100.91	1875.39	>31600	>31600	3848.24	147.429	3973.19	2212.19	3630.5	>31600	1411.73	6875.83	3703.58	16565	1334.15	23333.6	>3160	>31600	>31600	497.036	4026.18	4088.63	>31600	2776.24	4223.8	6336.41	>31600	151.299	24959.7	>31600	>31600
U2OS	>31600	3791.33	19336.8	16321.6	1235.57	4121.35	>31600	3857.13	279.278	3446.42	>10000	3312.31	8823.21	1458.13	4454.48	3451.79	12833	223.791	10089.3	>3160	>31600	8636.03	1028.88	1290.83	2945.56	>31600	2668.73	3375.5	4780.36	10601.9	3.90243	22094	>31600	10670.7
U-87MG ATCC	>31600	3099.82	17463.7	22946.1	8526.27	8589.31	22.7746	4435.34	924.594	221.947	3604.27	4413.46	10494.6	1052.47	7077.29	8822.09	14949.1	2248.46	>31600	>3160	>31600	>31600	4332.8	3740.83	3116.02	>31600	20826.2	>31600	>31600	1085.87	245.14	>31600	>31600	>31600
UM-UC-3	>31600	3298.35	17097.6	5486.94	1319.71	124.364	>31600	2572.39	42.5969	2768.9	1946.61	3187.27	25303.8	993.346	6868.98	7495.65	13151.6	460.617	>31600	624.535	>31600	>31600	935.203	4115.51	1598.01	>31600	2832.75	2889.68	1302.89	801.302	21.4349	8398.06	>31600	24130.6
VA-ES-BJ	9577.12	>10000	5918.49	27060.3	633.375	8280.47	25.6016	4249.3	4579.71	30.8945	2095.86	3554.38	2935.79	1125.56	6408.67	5466.98	19092.8	431.088	24110.8	>3160	>31600	>31600	349.269	2218.02	2605.54	>31600	7768.94	4084.38	2786.74	>31600	89.4443	25854.6	>31600	27983.3
	*Inhibitor has been profiled prior to the current study (DOI: 10.1158/1535-7163.MCT-18-0877). A more extensive profiling is reported here.
	$Inhibitor has been profiled prior to the current study (DOI: 10.1038/s41416-020-01257-x). A more extensive profiling is reported here.
